# Supplementary material
Source: publisher figshare collection journal article supplement (https://acs.figshare.com/ndownloader/files/25400963)
Supplement: Supplementary file 1 [file 25400963]

## Sheet: Table 1
Supplementary Table 1.
Number of cycles of shaking at 27 Hz for 1 min required to completely homogenize tissue samples
Tissue	No. Cycles Required
	Method B (Beads)	Method L (Lyophilization)
Brain	3	3
Heart	3	3
Kidney	3	4
Liver	5	3
Lung	3	3
Muscle	12	3
Pancreas	3	3
Spleen	3	3
White Adipose	3	3

## Sheet: Table 2
Supplementary Table 2.
112 peptides measured in 9 mouse tissues for optimization of tissue preparation workflows.
Uniprot Accession Number	Peptide Sequence
E9Q401	DLYAFYPLLIR
O08749	IDVSVEAASGGK
O08795	ETVVTSTTEPSR
O08997	AVSYLGPK
O09061	EETVPLR
O35737	IQNGAQGIR
O54984	LLNFPTIVER
O70251	ASLPGVK
O70435	SNFGYNIPLK
O88545	ASEAGEVPFNHEILR
P01942	VDPVNFK
P02088	VITAFNDGLNHLDSLK
P05202	FVTVQTISGTGALR
P07724	LVQEVTDFAK
P08228	VISLSGEHSIIGR
P09103	SNFEEALAAHK
P10518	LAEVALAYAK
P10605	NGPVEGAFTVFSDFLTYK
P10639	EAFQEALAAAGDK
P10649	YIATPIFSK
P11438	ALQATVGNSYK
P15105	DIVEAHYR
P16045	SFVLNLGK
P16125	IVVVTAGVR
P17742	FEDENFILK
P18760	NIILEEGK
P20029	NQLTSNPENTVFDAK
P21460	ALDFAVSEYNK
P24527	DLSSHQLNEFLAQVLQK
P24547	NLIDAGVDALR
P25444	EVATAIR
P26043	AFAAQEDLEK
P26443	YNLGLDLR
P28271	YQQAGLPLIVLAGK
P35123	VEVYLLELK
P35293	ILIIGESGVGK
P35486	AHGFTFTR
P35505	ASSIVVSGTPIR
P35700	ADEGISFR
P35980	TAVVVGTVTDDVR
P40142	AVELAANTK
P47199	AAQAHEDIIHGSGK
P49722	SILYDER
P50247	VPAINVNDSVTK
P52480	GSGTAEVELK
P53026	ILGPGLNK
P54726	ILSDDVPIK
P56380	ELNYVAR
P56480	IGLFGGAGVGK
P58389	LVALLDTLDR
P60229	YLTTAVITNK
P61027	AFLTLAEDILR
P61089	TNEAQAIETAR
P62267	GHAVGDIPGVR
P62751	LYDIDVAK
P62827	NLQYYDISAK
P62897	TGPNLHGLFGR
P62918	AVVGVVAGGGR
P62962	SSFFVNGLTLGGQK
P63101	FLIPNASQPESK
P70168	LAATNALLNSLEFTK
P70296	LYEQLSGK
P80313	LLDVVHPAAK
P80318	TAVETAVLLLR
P97807	YYGAQTVR
P99026	FQIATVTEK
Q01768	NIIHGSDSVESAEK
Q06890	SLLNSLEEAK
Q11011	VLGATLSPELIQK
Q2NL51	VTTVVATVGQGPER
Q3TCH7	TLGHNLLVSELYNQLK
Q3TXS7	DTSEDVEELVEPVAAHGPK
Q61990	IITLAGPTNAIFK
Q62418	VAGTGEGGLEELVEELNSGK
Q64442	AVEAFETAK
Q64727	ALASQLQDSLK
Q6P1F6	VVIFQQEQENK
Q6P8X1	NLVELAELELK
Q6ZPJ3	SGYPDIGFPLFPLSK
Q78ZA7	EAATVEELNPK
Q8BGC0	LLDEDEIR
Q8BK64	ETFLTSPEELYR
Q8BWT1	TNVSGGAIALGHPLGGSGSR
Q8CHP8	GETAVPGAPETLR
Q8QZT1	LNVKPLAR
Q8VDK1	FPELSLK
Q91VR2	VYGTGSLALYEK
Q91X72	GPDSVFLIK
Q920E5	GLTVVQAFQELVEPK
Q921I1	IPSHAVVAR
Q93092	LAPALSVK
Q99KB8	HVEPGNAAIQEK
Q9CPU0	VLGLTLLQK
Q9CPX6	ALEVAEYLTPVLK
Q9CPY7	GVLFASGQNLAR
Q9CQ60	LLSVPFEK
Q9CQI6	EVVQNFAK
Q9D358	IELLGSYDPQK
Q9D6R2	IAEFAFEYAR
Q9D819	DISDVER
Q9D898	ALAVGGLGSIIR
Q9D8Y0	LSEIDVSTEGVK
Q9DBP5	SVDEVFGEVVK
Q9DCW4	AGDLGVDLTSK
Q9QZD9	SGEVLVNVK
Q9R0P5	HEYQANGPEDLNR
Q9R1P0	VEIATLTR
Q9R1P4	ETLPAEQDLTTK
Q9WTP6	NGFLLDGFPR
Q9WUM4	YFEITDESPYVHYLNTFSSK
Q9Z1Q5	NSNPALNDNLEK
Q9Z2U1	EELEEVIK

## Sheet: Table 3
Supplementary Table 3.
Targets measured in 20 mouse tissues for comparison of perfused and non-perfused tissues.
Mouse UniProtKB Accession	Mouse Gene	Peptide Sequence	Tissues Measured
A2A432	Cul4b	ETVEEQASTTER	Liver (both lobes)
A2A5R2	Arfgef2	EIIEHGIELFNK	Liver (both lobes)
A2ADY9	Ddi2	VLVEQQQDR	Lung
A2AMM0	Cavin4	SVQIDLLK	Lung
A2ARV4	Lrp2	VTLITENLGHPR	Brain
A2AUC9	Klhl41	LYQSTLLQDGLK	Skeletal Muscle
A3KMP2	Ttc38	ELLTTLQEASK	Epididymis|Seminal Vesicles
A6H630	Armt1	TPQILTK	Testes|Seminal Vesicles
A6X8Z5	Arhgap31	TVTTGGFFIPATK	Liver (both lobes)
A6X935	Itih4	TLFSVLPGLK	Plasma|Heart
B2RSH2	Gnai1	IAQPNYIPTQQDVLR	Brain|Kidney
B9EKI3	Tmf1	LGESQTLLAAAVER	Brain|Testes
D0QMC3	Mndal	GILEINETSSVLK	Skin|Spleen|Salivary Gland
D3YXK2	Safb	GVPVISVK	Brain|Testes|Lung
D3Z6P0	Pdia2	NFEQVAFDETK	Spleen|Pancreas
D3Z6Q9	Bin2	AGGAAGLFAK	Brain
D3Z7P3	Gls	YAIAVNDLGTEYVHR	Eye|Heart
E9PV24	Fga	EINLQDYEGHQK	Plasma|Red Blood Cells|Skin
E9PX95	Abca17	FQLAYIPSK	Testes
E9Q414	Apob	LSLEDTPK	Plasma
E9Q4Z2	Acacb	LGGIPVGVIAVETR	Liver (both lobes)
E9Q555	Rnf213	NLEQVLR	Brain|Skin|Lung|Spleen|Salivary Gland
E9Q634	Myo1e	VFDFLVDSINK	Skin|Spleen|Salivary Gland
F6SEU4	Syngap1	AGYVGLVTVPVATLAGR	Lung
G3X982	Aox3	IHPVQER	Liver (both lobes)
G5E829	Atp2b1	TSPNEGLSGNPADLER	Red Blood Cells|Ovary
G5E8K5	Ank3	VGLQAQPVPEETVK	Kidney
O08528	Hk2	GLGATTHPTAAVK	Skeletal Muscle
O08529	Capn2	NFFLTTR	Kidney|Skin|Spleen|Salivary Gland
O08553	Dpysl2	VFNLYPR	Brain|Eye|Heart|White Adipose|Brown Adipose
O08553	Dpysl2	NLHQSGFSLSGAQIDDNIPR	White Adipose|Brown Adipose
O08573	Lgals9	FNENAVVR	Epididymis
O08583	Alyref	QYNGVPLDGR	Skin|Brown Adipose|Spleen|Salivary Gland
O08677	Kng1	ATSQVVAGTK	Plasma|Skin|Lung|White Adipose
O08689	Mstn	EQIIYGK	Plasma
O08709	Prdx6	LSILYPATTGR	Plasma|Liver (both lobes)|Brain|Red Blood Cells|Kidney|Skin|Eye|Lung|Heart|Skeletal Muscle|Spleen|Salivary Gland
O08742	Gp5	HHPDILGR	Plasma
O08749	Dld	IDVSVEAASGGK	Liver (both lobes)|Brain|Kidney|Testes|Lung|Seminal Vesicles|Skeletal Muscle|Spleen|Pancreas
O08756	Hsd17b10	DLAPTGIR	Liver (both lobes)|Brain|Kidney|Skin|Lung|Epididymis|Seminal Vesicles|Spleen|Salivary Gland
O08784	Tcof1	VLTELLEQER	Skin|Spleen|Salivary Gland
O08795	Prkcsh	ETVVTSTTEPSR	Plasma|Liver (both lobes)|Brain|Kidney|Testes|Skin|Lung|White Adipose|Skeletal Muscle|Spleen|Pancreas
O08807	Prdx4	VSVADHSLHLSK	Plasma|White Adipose
O08914	Faah	QGLLYGVPVSLK	Liver (both lobes)
O08966	Slc22a1	GVALPETIEEAENLGR	Kidney
O08997	Atox1	AVSYLGPK	Plasma|Liver (both lobes)|Brain|Kidney|Testes|Skin|Lung|White Adipose|Brown Adipose|Skeletal Muscle|Spleen|Pancreas
O09000	Ncoa3	ELQPQADSGDSK	Testes
O09012	Pex5	DLFLAAVR	Liver (both lobes)
O09061	Psmb1	EETVPLR	Plasma|Liver (both lobes)|Brain|Red Blood Cells|Kidney|Testes|Lung
O09106	Hdac1	YYAVNYPLR	Testes
O09131	Gsto1	EALENEFK	Brain|Red Blood Cells|Skin|Eye|Lung|Heart|White Adipose|Brown Adipose|Spleen|Salivary Gland
O09159	Man2b1	GVSEPLLETDTGDK	Plasma|Epididymis|Seminal Vesicles
O09164	Sod3	SVVVHAGEDDLGK	Plasma|Lung|White Adipose|Skeletal Muscle
O09165	Casq1	VINVNAK	Lung
O09167	Rpl21	GDIVDIK	Liver (both lobes)|Brain|Kidney
O09172	Gclm	IVAIGTSDLDK	Brain|Red Blood Cells|Testes|Skin|Seminal Vesicles|Spleen|Salivary Gland
O35098	Dpysl4	LAEIHGVPR	Brain
O35114	Scarb2	IVEWNGK	Kidney|Pancreas|Salivary Gland
O35129	Phb2	IGGVQQDTILAEGLHFR	Liver (both lobes)|Lung|Ovary|Seminal Vesicles
O35206	Col15a1	GGVLFAITDAFQK	Liver (both lobes)
O35215	Ddt	IPAGLENR	Skeletal Muscle
O35286	Dhx15	YGVIILDEAHER	Kidney|Pancreas|Salivary Gland
O35295	Purb	VSEVKPSYR	Liver (both lobes)|Brain
O35309	Nmi	GQALITFEK	Lung
O35343	Kpna4	IEQLQNHENEDIYK	Skeletal Muscle
O35344	Kpna3	IEVLQQHENEDIYK	Liver (both lobes)|Skin|Skeletal Muscle|Spleen|Salivary Gland
O35350	Capn1	YLGQDYETLR	Red Blood Cells|Lung|Skeletal Muscle
O35381	Anp32a	DLSTIEPLK	Liver (both lobes)|Brain|Red Blood Cells|Skin|Lung|Spleen|Pancreas
O35459	Ech1	AVVVSGAGK	Liver (both lobes)
O35469	Hsd3b6	SPFISNTIITALK	Ovary
O35488	Slc27a2	DETLTYAQVDR	Liver (both lobes)|Kidney
O35490	Bhmt	EAYNLGVR	Red Blood Cells
O35516	Notch2	ALGTLLHTNLR	Lung
O35594	Ift81	NLEVELR	Ovary
O35598	Adam10	EAVIAQISSHVK	Liver (both lobes)
O35638	Stag2	ITELFAVALPQLLAK	Testes|Skin|Lung|Seminal Vesicles|Spleen|Salivary Gland
O35639	Anxa3	TLINILTER	Brain
O35643	Ap1b1	APEVSQHVYQAYETILK	Brain
O35678	Mgll	IDSSVLSR	Ovary|Brown Adipose
O35737	Hnrnph1	IQNGAQGIR	Liver (both lobes)|Brain|Kidney|Testes|Lung|Skeletal Muscle|Spleen|Pancreas
O35744	Chil3	AFEEESVEK	Lung
O35855	Bcat2	VSSIFK	Kidney|Pancreas|Salivary Gland
O35864	Cops5	LEQSEAQLGR	Testes|Skeletal Muscle
O35887	Calu	HLVYESDQNK	Skin|Heart|Skeletal Muscle|Spleen|Salivary Gland
O35892	Sp100	LGSYLIR	Skin|Spleen|Salivary Gland
O35930	Gp1ba	LENLDLSHNNLK	Plasma
O35955	Psmb10	DGVILGADTR	Plasma
O35969	Gamt	AAPAAYDASDTHLQILGK	Liver (both lobes)|Testes
O54734	Ddost	DTHSLFFR	Kidney|Pancreas
O54749	Cyp2j5	LPFVGNFFQIDTK	Kidney
O54824	Il16	LLTTQSEDTQGPGLK	Skin|Spleen|Salivary Gland
O54943	Per2	ASTLATLK	Liver (both lobes)
O54974	Lgals7	GQPFEVLLIATEEGFK	Liver (both lobes)
O54984	Asna1	LLNFPTIVER	Liver (both lobes)|Brain|Kidney|Testes|Lung
O55013	Trappc3	LIEDFLAR	Brain|Lung
O55022	Pgrmc1	DFTPAELR	Liver (both lobes)|Brain|Kidney|Testes|Ovary|Seminal Vesicles|Spleen|Pancreas
O55023	Impa1	LQVSQQEDITK	Liver (both lobes)|Brain|Red Blood Cells|Spleen|Pancreas
O55029	Copb2	AAESLADPTEYENLFPGLK	Skeletal Muscle|Spleen |Pancreas
O55042	Snca	TVEGAGNIAAATGFVK	Plasma|Brain|Red Blood Cells|Kidney
O55098	Stk10	ALEEDLNQK	Lung
O55111	Dsg2	ITHQESTSVLLQQSER	Plasma
O55131	Septin7	DVTNNVHYENYR	Brain|Skin|Heart|Spleen|Salivary Gland
O55135	Eif6	HGLLVPNNTTDQELQHIR	Liver (both lobes)
O55142	Rpl35a	DETEFYLGK	Kidney|Ovary|Spleen|Pancreas
O55143	Atp2a2	IGIFGQDEDVTSK	Liver (both lobes)|Brain|Kidney|Lung|Skeletal Muscle|Spleen|Pancreas
O55234	Psmb5	ISVAAASK	Liver (both lobes)|Red Blood Cells|Lung
O70165	Fcn1	VVGLGAQDK	Plasma
O70194	Eif3d	IFHTVTTTDDPVIR	Liver (both lobes)
O70200	Aif1	YSNDEDLPSK	Skin|Spleen|Salivary Gland
O70209	Pdlim3	LSGGIDFNQPLVITR	Skeletal Muscle
O70237	Gfi1b	LYGSPLVPSTESPLDFR	Epididymis
O70250	Pgam2	HNYYTSISK	Testes
O70251	Eef1b	ASLPGVK	Plasma|Liver (both lobes)|Brain|Kidney|Testes|Lung|White Adipose|Brown Adipose
O70252	Hmox2	AENTQFVK	Liver (both lobes)|Kidney|Skin|Spleen|Salivary Gland
O70310	Nmt1	AIELFSVGQGPAK	Spleen|Pancreas
O70362	Gpld1	LGTSLSSGYVR	Plasma
O70370	Ctss	YIQLPFGDEDALK	Plasma
O70404	Vamp8	GENLDHLR	Ovary
O70435	Psma3	SNFGYNIPLK	Liver (both lobes)|Brain|Red Blood Cells|Kidney|Testes|Skin|Eye|Lung|Heart|Spleen|Salivary Gland
O70439	Stx7	TLNQLGTPQDSPELR	Brain|Lung|Heart|White Adipose
O70456	Sfn	YLAEVATGDDK	Plasma|Skin|Eye|Heart
O70468	Mybpc3	AHNVAGPGGPIVTK	Heart
O70475	Ugdh	IAILGFAFK	Brain
O70492	Snx3	FTTYEIR	Lung
O70497	Fcn2	VDLSDFEGK	Lung
O88342	Wdr1	VFASLPQVER	Brain|Red Blood Cells|Skin|Lung|Ovary|White Adipose|Brown Adipose|Epididymis|Seminal Vesicles|Spleen|Salivary Gland
O88342	Wdr1	FTIGDHSR	Plasma|Red Blood Cells|White Adipose|Brown Adipose|Epididymis
O88351	Ikbkb	DLKPENIVLQQGEK	Testes
O88451	Rdh7	VAIIEPGGFR	Liver (both lobes)
O88456	Capns1	SHYSNIEANESEEVR	Spleen|Pancreas
O88487	Dync1i2	TLAEINANR	Kidney|Heart|Spleen|Pancreas
O88543	Cops3	VQLSGPQEAEK	Brain|Red Blood Cells|Lung
O88545	Cops6	ASEAGEVPFNHEILR	Brain|Red Blood Cells|Testes|Skin|Lung|Spleen|Salivary Gland
O88569	Hnrnpa2b1	YHTINGHNAEVR	Eye|Heart
O88587	Comt	VSILIGASQDLIPQLK	Skin|Heart|Brown Adipose|Epididymis|Seminal Vesicles|Spleen|Salivary Gland
O88685	Psmc3	DAFALAK	Plasma|Red Blood Cells|Kidney|Spleen|Pancreas
O88703	Hcn2	GIDSEVYK	Heart
O88736	Hsd17b7	YATDLLNVALNR	Ovary
O88783	F5	AEVDDVIQVR	Plasma
O88822	Sc5d	EIVFTVK	Liver (both lobes)
O88844	Idh1	GLPNVQR	Brain|Skin|Eye|Heart|Spleen|Salivary Gland
O88947	F10	TGIVSGFGR	Plasma
O88952	Lin7c	IIPGGIADR	Brown Adipose|Epididymis|Seminal Vesicles
O88958	Gnpda1	LVDPLYSIK	Seminal Vesicles
O88968	Tcn2	IDSQLVEK	Plasma
O88990	Actn3	TINEVENQVLTR	Skeletal Muscle
O88998	Olfm1	DLQYVEK	Plasma|Brain
O89001	Cpd	IVIVPSLNPDGR	Brain
O89020	Afm	AAPITQYLK	Plasma
O89020	Afm	VLNSINVAVFSK	White Adipose
O89051	Itm2b	NLLELLINIK	Lung
O89053	Coro1a	HVFGQPAK	Brain|Skin
O89079	Cope	YGVVLDEIKPSSAPELQAVR	Liver (both lobes)|Testes|Lung
O89086	Rbm3	YDSRPGGYGYGYGR	Testes
O89104	Sypl2	LEEPLGFIK	Skeletal Muscle
O89110	Casp8	GVVYGTDGK	Skin|Ovary|Brown Adipose|Spleen|Salivary Gland
O89112	Lancl1	AFPNPYADYNK	Brain|Skeletal Muscle
P00186	Cyp1a2	IHEELDTVVGR	Liver (both lobes)
P00329	Adh1	GAIFGGFK	Liver (both lobes)|Brain|Lung|Epididymis|Seminal Vesicles|Skeletal Muscle
P00375	Dhfr	LLPEYPGVLSEVQEEK	Liver (both lobes)|Skeletal Muscle|Spleen|Pancreas
P00405	Mtco2	TDAIPGR	Liver (both lobes)|Brain|Heart
P00493	Hprt1	VIGGDDLSTLTGK	Liver (both lobes)
P00493	Hprt1	VASLLVK	Spleen|Pancreas
P00687	Amy1	VYVGNDGK	Plasma
P00688	Amy2	GSEYFGNGR	Plasma|Spleen|Pancreas
P00920	Ca2	IGPASQGLQK	Plasma|Brain|Red Blood Cells|Skin|Eye|Lung|Heart|Skeletal Muscle|Spleen|Pancreas
P01027	C3	GTLSVVAVYHAK	Plasma|Brain|Lung|Heart
P01029	C4b	DHAVDLIQK	Plasma|Red Blood Cells|Testes|Lung|Heart
P01592	Jchain	IIPSTEDPNEDIVER	Plasma|Heart
P01630	NA	FSGSGSGTAFTLR	Plasma
P01631	NA	FSGSGSGTDFTLK	Plasma
P01634|P01633	NA|Igk-V19-17	YTGVPDR	Plasma
P01635	NA	TLADGVPSR	Plasma
P01636	NA	FSGSGSGTQFSLK	Plasma
P01639	Gm5571	LIYATSSLDSGVPK	Heart
P01642	Gm10881	YASESISGIPSR	Heart
P01643	NA	LLIYYTSSLHSGVPSR	Plasma
P01674	NA	YASNLESGVPAR	Plasma
P01680	NA	TSNLASGVPAR	Plasma
P01750	NA	IHPSDSDTNYNQK	Plasma
P01786	NA	ALEWLGFIR	Plasma
P01837	Igkc	TSTSPIVK	Plasma|Skin|Lung|Heart|Skeletal Muscle|Spleen|Pancreas
P01864	NA	ALPSPIEK	Plasma|Lung|Heart
P01867	Igh-3	DLPSPIER	Plasma|Skin|Lung|Heart|White Adipose|Brown Adipose|Spleen|Salivary Gland
P01868|P01869	Ighg1|Ighg1	DVLTITLTPK	Plasma|Lung|Heart
P01872	Ighm	LVESGFTTDPVTIENK	Plasma|Red Blood Cells|Skin|Lung|White Adipose|Spleen|Pancreas
P01878	NA	EPGEGATTYLVTSVLR	Plasma
P01887	B2m	TPQIQVYSR	Plasma
P01898	H2-Q10	YFETSVSRPGLGEPR	Plasma
P01942	Hba	TYFPHFDVSHGSAQVK	Plasma|Skin|Skeletal Muscle|Spleen|Salivary Gland
P01942|P06467	Hba|Hbz	VDPVNFK	Plasma|Brain|Heart
P02088	Hbb-b1	VITAFNDGLNHLDSLK	Plasma|Testes|Skin|Eye|Heart|Skeletal Muscle
P02089	Hbb-b2	VITAFNEGLK	Red Blood Cells|Skeletal Muscle
P02469	Lamb1	YSDIEPSTEGEVIFR	Lung
P02525	Cryba1	ITIYDQENFQGK	Liver (both lobes)
P03976	NA	FSSSGSGTDFTLR	Plasma
P03987	NA	ALPAPIER	Plasma
P03995	Gfap	LADVYQAELR	Plasma
P04117	Fabp4	LGVEFDEITADDR	Lung|White Adipose|Brown Adipose
P04186	Cfb	DLEIEEVLFHPK	Lung|White Adipose|Brown Adipose
P04202	Tgfb1	LHVEINGISPK	Plasma
P04247	Mb	GQHAAEIQPLAQSHATK	Liver (both lobes)|Brain|Kidney|Skin|Eye|Lung|Heart
P04345	Cryga	SIPYTSSHR	Eye|Heart
P04919	Slc4a1	YHPDVPFVK	Red Blood Cells|Skin|Lung|Spleen|Salivary Gland
P04925	Prnp	ESQAYYDGR	Brain
P04945	NA	LLIYDTSNLASGVPVR	Plasma|Heart
P05017	Igf1	GFYFNKPTGYGSSIR	Plasma|White Adipose
P05063	Aldoc	ELSDIALR	Liver (both lobes)|Brain|Eye|Heart
P05064|Q91Y97|P05063	Aldoa|ALdob|Aldoc	VLAAVYK	Plasma|Red Blood Cells|Skin|Lung|Heart
P05201	Got1	VGGVQSLGGTGALR	Liver (both lobes)|Skeletal Muscle
P05202	Got2	FVTVQTISGTGALR	Liver (both lobes)|Brain|Kidney|Testes|Lung
P05208	Cela2a	LASPVTLSK	Skeletal Muscle|Spleen|Pancreas
P05366|P05367	Saa1|Saa2	GNYDAAQR	Plasma
P05367	Saa2	ESFQEFFGR	Plasma
P05784	Krt18	AQYEALAQK	Liver (both lobes)
P06151	Ldha	VTLTPEEEAR	Liver (both lobes)|Red Blood Cells|Eye|Heart|Epididymis|Seminal Vesicles|Skeletal Muscle
P06683	C9	TENYDEHLEVFK	Plasma|White Adipose
P06684	C5	VTFSSGYVNLSPENK	Plasma|Red Blood Cells
P06684	C5	IDTQDIEASSHFR	White Adipose
P06728	Apoa4	SLEDLNR	Plasma|Liver (both lobes)|Red Blood Cells|Kidney|Skin|Lung|Heart|White Adipose|Brown Adipose|Spleen|Pancreas
P06745	Gpi	AVLHVALR	Eye|Heart|Epididymis|Skeletal Muscle
P06796	Csn3	SPAPISK	Plasma
P06797	Ctsl	ENGGLDSEESYPYEAK	Epididymis
P06802	Enpp1	AEYLHTWGGLLPVISK	Testes
P06869	Plau	ESESDYLYPK	Kidney|Epididymis|Seminal Vesicles
P06909	Cfh	VEYSHGEVVK	Plasma|White Adipose
P06909	Cfh	TGEQVTFR	White Adipose|Brown Adipose
P07146	Prss2	LGEHNINVLEGNEQFVDSAK	Spleen|Pancreas
P07214	Sparc	LEAGDHPVELLAR	Plasma
P07309	Ttr	TAESGELHGLTTDEK	Plasma|Skeletal Muscle|Spleen|Pancreas
P07310	Ckm	FEEILTR	Brain|Eye|Lung|Heart|White Adipose|Brown Adipose|Epididymis|Seminal Vesicles
P07356	Anxa2	TPAQYDASELK	Skin|Lung|White Adipose|Brown Adipose|Skeletal Muscle
P07361	Orm2	IFADLIVLK	Plasma|Heart
P07724	Alb	LVQEVTDFAK	Liver (both lobes)|Brain|Kidney|Testes|Eye|Lung|Heart|Ovary|Skeletal Muscle|Spleen|Pancreas
P07743	Bpifa2	NSILETLNTADLGNLK	Plasma
P07758|Q00896	Serpina1a|Serpina1c	LAQIHFPR	Lung
P07758|Q00896|Q00897|P22599|Q00898	Serpina1a|Serpina1c|Serpina1d|Serpina1b|Serpina1e	VINDFVEK	Plasma|Heart|White Adipose|Brown Adipose
P07759	Serpina3k	ALYQTEAFTADFQQPTEAK	Liver (both lobes)|Brain|Red Blood Cells|Skin|Lung|Ovary
P08030	Aprt	DALEPGQR	Skin|Spleen|Salivary Gland
P08071	Ltf	DNAGDVAFTR	Plasma
P08113	Hsp90b1	FQSSHHSTDITSLDQYVER	Liver (both lobes)|Skin|Spleen|Salivary Gland
P08121	Col3a1	GGAGPPGPEGGK	Plasma
P08122	Col4a2	SVSIGYLLVK	Lung
P08226	Apoe	LGPLVEQGR	Brown Adipose
P08226	Apoe	TANLGAGAAQPLR	Plasma|Red Blood Cells|Skin|Lung|White Adipose
P08228	Sod1	VISLSGEHSIIGR	Plasma|Liver (both lobes)|Brain|Red Blood Cells|Kidney|Testes|Eye|Lung|Heart|Ovary|Spleen|Pancreas
P08249	Mdh2	NSPLVSR	Eye|Lung|Heart|Epididymis|Seminal Vesicles
P08551	Nefl	YEEEVLSR	Brain
P08607	C4bpa	TDFESHTTLK	Lung
P08752	Gnai2	IAQSDYIPTQQDVLR	Liver (both lobes)|Brain|Spleen|Pancreas
P09036	Spink1	IEPVLIR	Testes|Seminal Vesicles
P09103	P4hb	SNFEEALAAHK	Plasma|Liver (both lobes)|Brain|Red Blood Cells|Kidney|Testes|Skin|Ovary|Skeletal Muscle|Spleen|Salivary Gland
P09411	Pgk1	YAEAVGR	Epididymis
P09470	Ace	SLYESDNLEQDLEK	Kidney
P09528	Fth1	SVNQSLLELHK	Plasma|Skeletal Muscle|Spleen|Pancreas
P09535	Igf2	GFYFSRPSSR	Plasma
P09541	Myl4	ALGQNPTNAEVLR	Heart
P09581	Csf1r	LEIPLNSDFQDNYYK	Plasma
P09581	Csf1r	VIIQSQLPIGTLK	Seminal Vesicles
P09671	Sod2	GDVTTQVALQPALK	Liver (both lobes)|Epididymis|Seminal Vesicles
P09803	Cdh1	GLDFEAK	Plasma|Skin
P09813	Apoa2	THEQLTPLVR	Plasma|Red Blood Cells|Lung|Heart
P0C6F1	Dnah2	GAYIPALLR	Ovary
P10126	Eef1a1	EVSTYIK	Plasma|Liver (both lobes)|Brain|Red Blood Cells|Kidney|Skin|Eye|Lung|Heart|Ovary|Spleen|Pancreas
P10404	NA	VTYHSPGYVYGQFER	Plasma
P10493	Nid1	YALSNSIGPVR	Plasma|White Adipose|Brown Adipose
P10518	Alad	LAEVALAYAK	Liver (both lobes)|Brain|Red Blood Cells|Kidney|Eye|Lung|Heart|Skeletal Muscle
P10605	Ctsb	HFGYTSYSVSNSVK	Plasma|White Adipose|Brown Adipose
P10605	Ctsb	NGPVEGAFTVFSDFLTYK	Liver (both lobes)|Brown Adipose
P10630	Eif4a2	ETQALVLAPTR	Liver (both lobes)|Brain|Kidney|Skeletal Muscle|Spleen|Pancreas
P10639	Txn	EAFQEALAAAGDK	Plasma|Liver (both lobes)|Brain|Red Blood Cells|Kidney|Testes|Skin|Lung|Heart|White Adipose|Brown Adipose|Skeletal Muscle|Spleen|Pancreas
P10649	Gstm1	YIATPIFSK	Plasma|Liver (both lobes)|Brain|Kidney|Testes|Skin|Eye|Lung|Heart|Ovary|Skeletal Muscle|Spleen|Pancreas
P10711	Tcea1	DTYVSSFPR	Brain
P10852	Slc3a2	VAEDETEAGVK	Kidney|Pancreas|Salivary Gland
P10922	H1-0	VGENADSQIK	Liver (both lobes)
P10923	Spp1	GDSLAYGLR	Plasma
P11087	Col1a1	GFSGLDGAK	Plasma|Ovary
P11247	Mpo	IANVFTNAFR	Plasma
P11276	Fn1	SYTITGLQPGTDYK	Plasma|Red Blood Cells
P11352	Gpx1	AHPLFTFLR	Red Blood Cells|White Adipose
P11404	Fabp3	SLGVGFATR	Eye|Lung|Heart|Skeletal Muscle
P11438	Lamp1	ALQATVGNSYK	Plasma|Brain|Red Blood Cells|Kidney|Testes|Skeletal Muscle
P11499	Hsp90ab1	IDIIPNPQER	Plasma|Liver (both lobes)|Brain|Red Blood Cells|Skin|Eye|Lung|Heart|Ovary|Skeletal Muscle|Spleen|Pancreas
P11672	Lcn2	ELSPELK	Testes|Lung
P11679	Krt8	LEGLTDEINFLR	Plasma|Lung
P11680	Cfp	LVVEEK	Plasma|White Adipose
P11688	Itga5	TPDFFGSALR	Ovary
P11725	Otc	SLVFPEAENR	Liver (both lobes)
P11798	Camk2a	ITQYLDAGGIPR	Brain
P11859	Agt	TLHDQLVLAAEK	Plasma|White Adipose
P11930	Nudt19	LENFASLSALYR	Liver (both lobes)
P11983	Tcp1	LLEVEHPAAK	Liver (both lobes)|Brain|Red Blood Cells|Skin|Skeletal Muscle|Spleen|Salivary Gland
P12032	Timp1	AVGNAADIR	Seminal Vesicles
P12246	Apcs	SQSLFSYSVK	Plasma
P12367	Prkar2a	GTYDILVTK	Brain|Kidney|Heart
P12399	Ctla2a	AYNLNEER	Plasma
P12970	Rpl7a	NFGIGQDIQPK	Liver (both lobes)
P12970	Rpl7a	AGVNTVTTLVENK	Liver (both lobes)|Brain|Red Blood Cells|Skeletal Muscle|Spleen|Pancreas
P13020	Gsn	HVVPNEVVVQR	Plasma|White Adipose
P13020	Gsn	GGVASGFK	Skin|Eye|Lung|Heart|White Adipose|Brown Adipose
P13439	Umps	FADIGNTVK	Liver (both lobes)|Lung
P13595	Ncam1	GLGEISAATEFK	Plasma|Liver (both lobes)|Brain|Kidney
P13597	Icam1	GEEILSR	Plasma
P13634	Ca1	VLDALNSVK	Plasma|Red Blood Cells
P13707	Gpd1	ANTIGISLIK	Plasma|Liver (both lobes)|Brain|Kidney|Testes|Epididymis|Skeletal Muscle
P14069	S100a6	LQDAEIAR	Skin|Epididymis|Seminal Vesicles|Skeletal Muscle|Spleen|Pancreas
P14094	Atp1b1	AYGENIGYSEK	Brain
P14106	C1qb	VITNANENYEPR	Plasma
P14131	Rps16	GPLQSVQVFGR	Brain|Skeletal Muscle
P14148	Rpl7	TTHFVEGGDAGNR	Liver (both lobes)|Brain|Testes|Eye|Heart
P14152	Mdh1	GEFITTVQQR	Liver (both lobes)|Lung|Ovary
P14206	Rpsa	FAAATGATPIAGR	Lung|Skeletal Muscle|Spleen|Pancreas
P14211	Calr	GQTLVVQFTVK	Brain|Skin|Lung|Ovary|Skeletal Muscle
P14602	Hspb1	AQIGGPEAGK	Testes|Lung|Seminal Vesicles|Skeletal Muscle
P14733	Lmnb1	IESLSSQLSNLQK	Eye|Heart|Ovary
P14847	Crp	AFVFPK	Plasma|White Adipose|Brown Adipose
P14869	Rplp0	GNVGFVFTK	Spleen|Pancreas
P14873	Map1b	VLFPGNSTQYNILEGLEK	Brain|Testes
P15105	Glul	DIVEAHYR	Plasma|Liver (both lobes)|Brain|Red Blood Cells|Testes|Lung|White Adipose|Brown Adipose
P15208	Insr	TIDSVTSAQELR	Liver (both lobes)
P15327	Bpgm	HYGALIGLNR	Plasma|Red Blood Cells|Heart|Epididymis|Seminal Vesicles
P15508	Sptb	LLSGEDVGQDEGATR	Liver (both lobes)
P15532	Nme1	FLQASEDLLK	Kidney|Pancreas|Salivary Gland
P15535	B4galt1	FDGLNSLTYK	Plasma|Ovary
P15626	Gstm2	FLSKPIFAK	Lung|Skeletal Muscle
P16015	Ca3	GDNQSPIELHTK	Plasma|Brain|Skin|Eye|Lung|Heart|Skeletal Muscle
P16045	Lgals1	SFVLNLGK	Plasma|Liver (both lobes)|Brain|Kidney|Testes|Skin|Eye|Lung|White Adipose|Brown Adipose|Skeletal Muscle|Spleen|Pancreas
P16125	Ldhb	IVVVTAGVR	Plasma|Liver (both lobes)|Brain|Kidney|Testes|Eye|Heart|Skeletal Muscle
P16294	F9	ASISYSSK	Plasma
P16301	Lcat	VSNAPGVQIR	Plasma
P16331	Pah	DFLGGLAFR	Liver (both lobes)
P16332	Mmut	IDSGSEVIVGVNK	Kidney|Pancreas|Salivary Gland
P16546	Sptan1	DLASVQALLR	Kidney|Salivary Gland
P16627	Hspa1l	LLQDYFNGR	Testes|Seminal Vesicles
P16675	Ctsa	ALHIPESLPR	Plasma
P16858	Gapdh	VGVNGFGR	Eye|Heart|Epididymis|Skeletal Muscle|Spleen|Pancreas
P17156	Hspa2	EIAEAYLGGK	Brain|Red Blood Cells|Testes|Epididymis|Seminal Vesicles
P17182	Eno1	EIFDSR	Brain|Kidney
P17182	Eno1	TIAPALVSK	Plasma|Liver (both lobes)|Brain|Kidney|Eye|Lung|Heart|Ovary|Skeletal Muscle|Spleen|Pancreas
P17427	Ap2a2	THIETVINALK	Liver (both lobes)|Red Blood Cells
P17563	Selenbp1	LAGQIFLGGSIVR	Kidney|Pancreas
P17710	Hk1	SANLVAATLGAILNR	Lung|Ovary|Seminal Vesicles
P17742	Ppia	FEDENFILK	Liver (both lobes)|Brain|Red Blood Cells|Testes|Skin|Lung|Skeletal Muscle|Spleen|Salivary Gland
P17751	Tpi1	SNVNDGVAQSTR	Brain|Eye|Lung|Heart|Ovary|Skeletal Muscle|Spleen|Pancreas
P17809	Slc2a1	VTILELFR	Eye
P18242	Ctsd	VSSLPTVYLK	Brain|Epididymis|Skeletal Muscle
P18242	Ctsd	NIFSFYLNR	Plasma|Liver (both lobes)|Brain|Kidney|Skin|Eye|Heart
P18293	Npr1	ITDYGLESFR	Plasma
P18337	Sell	EIEYLENTLPK	Plasma
P18419	Svs4	FLQSEETVR	White Adipose|Brown Adipose
P18572	Bsg	VLQEDTLPDLHTK	Liver (both lobes)|Red Blood Cells|Kidney|Testes|Skin|Lung|Seminal Vesicles|Spleen|Salivary Gland
P18760	Cfl1	NIILEEGK	Plasma|Liver (both lobes)|Brain|Kidney|Testes|Skin|Lung|Ovary|Spleen|Pancreas
P19096	Fasn	VAEVLAGEGHLYSR	Liver (both lobes)|Brain|Red Blood Cells|Lung|White Adipose|Brown Adipose
P19157	Gstp1	YVTLIYTNYENGK	Kidney|Pancreas|Salivary Gland
P19221	F2	TTDAEFHTFFNEK	Plasma|Heart
P19253	Rpl13a	LAAIVAK	Brain
P19324	Serpinh1	DNQSGSLLFIGR	Kidney|Pancreas
P19973	Lsp1	SQPTLPISTIDER	Skin|Lung|Spleen|Salivary Gland
P20029	Hspa5	NQLTSNPENTVFDAK	Plasma|Liver (both lobes)|Brain|Red Blood Cells|Kidney|Testes|Skin|Eye|Lung|Heart
P20152	Vim	EEAESTLQSFR	Liver (both lobes)|Eye|Lung|Heart
P20357	Map2	VGSLDNAHHVPGGGNVK	Brain
P20443	Sag	TLVLVPLLANNR	Eye
P20444	Prkca	GTEELYAIK	Skin|Ovary|Spleen|Salivary Gland
P20612	Gnat1	LVTPGYVPTEQDVLR	Eye|Heart
P20918	Plg	EAQLPVIENK	Plasma|Lung|Ovary
P21180	C2	VPAHFVALNGNR	Plasma
P21460	Cst3	ALDFAVSEYNK	Plasma|Liver (both lobes)|Brain|Kidney|Skeletal Muscle
P21550	Eno3	GNPTVEVDLHTAK	Brain|Skin|Eye|Lung|Heart|Skeletal Muscle|Spleen|Pancreas
P21550	Eno3	IEEALGDK	Plasma
P21570	Ang	DVNTFIHGNK	Plasma
P21614	Gc	VLEPTLK	Plasma|Red Blood Cells|Lung
P21956	Mfge8	FEFIQDESGGDK	Testes|Lung
P21981	Tgm2	YPEGSPEER	Red Blood Cells
P22437	Ptgs1	LQPFNEYR	Skin|Heart|Spleen|Salivary Gland
P22599	Serpina1b	LVQIHIPR	Plasma|Epididymis|Seminal Vesicles|Skeletal Muscle
P22892	Ap1g1	VLAINILGR	Liver (both lobes)|Brain|Kidney|Lung|Spleen|Pancreas
P22907	Hmbs	SAVGTSSLR	Kidney|Pancreas|Salivary Gland
P23116	Eif3a	VLLATLSIPITPER	Brain|Spleen|Pancreas
P23198	Cbx3	DSDEADLVLAK	Liver (both lobes)|Skin|Spleen|Salivary Gland
P23242	Gja1	SFPISHVR	Testes
P23492	Pnp	VFGFSLITNK	Skeletal Muscle|Spleen|Pancreas
P23780	Glb1	TLATSLYNLLAR	Kidney
P23927	Cryab	VLGDVIEVHGK	Liver (both lobes)|Brain|Eye|Heart|Skeletal Muscle
P23953	Ces1c	TESELLEISGK	Plasma|Liver (both lobes)|Brain|Red Blood Cells|Skin|Lung|Heart|White Adipose|Skeletal Muscle|Spleen|Pancreas
P24270	Cat	NFTDVHPDYGAR	Brain|Red Blood Cells|Skin|Lung
P24369	Ppib	TVDNFVALATGEK	Liver (both lobes)|Brain|Kidney|Lung|Ovary|Epididymis|Seminal Vesicles|Skeletal Muscle|Spleen|Pancreas
P24452	Capg	YSPNTQVEILPQGR	Brain|Skin|Epididymis|Seminal Vesicles|Spleen|Salivary Gland
P24472	Gsta4	YFPVFEK	Liver (both lobes)|Brain|Eye|Lung|Heart|Epididymis|Seminal Vesicles
P24529	Th	EVYATLK	Testes
P24547	Impdh2	NLIDAGVDALR	Brain|Red Blood Cells|Testes|Lung
P24549	Aldh1a1	ILDLIESGK	Liver (both lobes)|Brain|Red Blood Cells|Skin|Lung|Ovary|White Adipose|Brown Adipose|Skeletal Muscle|Spleen|Pancreas
P24668	M6pr	NVPAAYR	Brain|Testes|Skin|Lung|Spleen|Salivary Gland
P24815	Hsd3b1	SPFIFNAIIR	Testes
P25444	Rps2	EVATAIR	Plasma|Liver (both lobes)|Brain|Kidney|Testes|Skin|Lung|White Adipose|Brown Adipose
P25688	Uox	EVATSVQLTLR	Liver (both lobes)
P25785	Timp2	EYLIAGK	Plasma
P26039	Tln1	AVAEQIPLLVQGVR	Brain|Red Blood Cells|Skin|Lung|Epididymis|Seminal Vesicles
P26040	Ezr	ELSEQIEK	Plasma|Liver (both lobes)|Brain|Red Blood Cells|Kidney|Skin|Eye|Lung|Heart|Spleen|Salivary Gland
P26041	Msn	ALTSELANAR	Brain|Skin|Lung|Heart|White Adipose|Brown Adipose|Epididymis|Seminal Vesicles
P26043	Rdx	AFAAQEDLEK	Plasma|Liver (both lobes)|Brain|Red Blood Cells|Kidney|Testes|Skin|Lung|Heart|Skeletal Muscle|Spleen|Pancreas
P26150	Hsd3b3	IIQLLVQEK	Kidney
P26231	Ctnna1	HVNPVQALSEFK	Liver (both lobes)
P26262	Klkb1	TGAISGHSLK	Plasma
P26339	Chga	ELQDLALQGAK	Plasma
P26350	Ptma	EVVEEAENGR	Liver (both lobes)|Skin|Skeletal Muscle|Spleen|Salivary Gland
P26443	Glud1	YNLGLDLR	Liver (both lobes)|Brain|Kidney|Lung|Skeletal Muscle|Spleen|Pancreas
P26516	Psmd7	SVVALHNLINNK	Skin|Heart|Ovary|Spleen|Salivary Gland
P26638	Sars	LLIDEAIQK	Kidney|Pancreas|Salivary Gland
P26645	Marcks	EEPASGSAATPAAAEK	Lung
P26928	Mst1	SPLNDFQLFR	Red Blood Cells
P27612	Plaa	IGDVVGSSGANQQTSGK	Kidney
P27659	Rpl3	VAFSVAR	Brain|Kidney
P27773	Pdia3	FAHTNIESLVK	Liver (both lobes)|Brain|Skin|Lung|Epididymis|Seminal Vesicles|Spleen|Salivary Gland
P28063	Psmb8	VESSDVSDLLYK	Skin|Spleen|Salivary Gland
P28076	Psmb9	VILGDELPK	Skin|Spleen|Salivary Gland
P28271	Aco1	YQQAGLPLIVLAGK	Liver (both lobes)|Brain|Kidney|Testes|Lung|Spleen|Pancreas
P28474	Adh5	IDPSAPLDK	Liver (both lobes)|Lung|Epididymis|Seminal Vesicles|Skeletal Muscle|Spleen|Pancreas
P28650	Adss1	VVDLLATDADIVSR	Liver (both lobes)|Lung
P28653	Bgn	IQAIELEDLLR	Brain|Kidney|Eye|Heart
P28654	Dcn	DLHTLILVNNK	Skin|Eye|Lung|Skeletal Muscle|Spleen|Pancreas
P28658	Atxn10	ALTALFK	Liver (both lobes)
P28663	Napb	LLEAHEEQNSEAYTEAVK	Brain
P28665	Mug1	HTNLVPHGTEK	Plasma|Skin|Heart|White Adipose|Spleen|Salivary Gland
P28738	Kif5c	ATEILNLLLK	Brain
P28798	Grn	LPDPQILK	Plasma|Skin|White Adipose|Brown Adipose|Seminal Vesicles
P28798	Grn	LPGYPVK	White Adipose
P29341	Pabpc1	GYGFVHFETQEAAER	Brain|Skin|Lung|Spleen|Salivary Gland
P29533	Vcam1	LHIDQIDSTLK	Plasma
P29621	Serpina3c	FSISTDYSLK	Plasma
P29699	Ahsg	EVTDPAK	White Adipose
P29758	Oat	ESVEIINK	Kidney|Pancreas|Salivary Gland
P29788	Vtn	IYVTGSLSHSAQAK	Plasma
P30115	Gsta3	YFPAFEK	Plasma|Liver (both lobes)|White Adipose|Brown Adipose|Epididymis|Seminal Vesicles
P30412	Ppic	TVENFVALATGEK	Liver (both lobes)|Kidney|Skeletal Muscle
P30416	Fkbp4	ALELDSNNEK	Liver (both lobes)|Brain|Kidney|Spleen|Pancreas
P30681	Hmgb2	IEHPGLSIGDTAK	Testes|Lung|Ovary|Seminal Vesicles
P30999	Ctnnd1	FVGDADLER	Lung
P31001	Des	FLEQQNAALAAEVNR	Skin|Spleen|Salivary Gland
P31230	Aimp1	GAPFEVK	Plasma
P31324	Prkar2b	SEVEENGAVEIAR	Brown Adipose
P31428	Dpep1	GLLADNLIR	Testes|Heart
P31532	Saa4	NHGLETLQATQK	Plasma
P31725	S100a9	SITTIIDTFHQYSR	Plasma
P31786	Dbi	QATVGDVNTDR	Liver (both lobes)
P32020	Scp2	IGGIFAFK	Liver (both lobes)|Epididymis|Seminal Vesicles|Skeletal Muscle
P32067	Ssb	EGIILFK	Liver (both lobes)|Brain|Lung
P32233	Drg1	IQLLDLPGIIEGAK	Brain|Lung
P32261	Serpinc1	DDLYVSDAFHK	Plasma
P32848	Pvalb	AIGAFAAADSFDHK	Skeletal Muscle
P33434	Mmp2	IDAVYEAPQEEK	Brain|Lung
P33587	Proc	LGEYDLR	Plasma
P34022	Ranbp1	LEALSVR	Brain|Red Blood Cells|Skin|Lung|Brown Adipose
P34057	Rcvrn	LIQFEPQK	Eye|Heart
P34884	Mif	LHISPDR	Plasma|Brain|Red Blood Cells|White Adipose
P34914	Ephx2	FLLDTLK	Kidney
P34927	Asgr1	DLTEDHSSLLLHVK	Liver (both lobes)|Testes
P34928	Apoc1	AAIEHIK	Red Blood Cells
P35123	Usp4	VEVYLLELK	Liver (both lobes)|Brain|Kidney|Testes|Lung
P35293	Rab18	ILIIGESGVGK	Brain|Testes|Lung
P35330	Icam2	LTLSLLR	Plasma
P35385	Hspb7	EDGSLTIR	Heart|Ovary|Brown Adipose
P35436	Grin2a	DLSFTEEGYQVHPR	Plasma|Heart
P35441	Thbs1	FVFGTTPEDILR	Plasma|Red Blood Cells|Skin|Spleen|Salivary Gland
P35455	Avp	LVQLAGTR	Plasma
P35486	Pdha1	AHGFTFTR	Liver (both lobes)|Brain|Kidney
P35505	Fah	ASSIVVSGTPIR	Plasma|Liver (both lobes)|Brain|Kidney|Testes|White Adipose|Brown Adipose
P35505	Fah	FGEPIPISK	White Adipose|Brown Adipose
P35564	Canx	APVPTGEVYFADSFDR	Liver (both lobes)|Brain|Lung
P35569	Irs1	HLVALYTR	Liver (both lobes)
P35700	Prdx1	ADEGISFR	Plasma|Brain|Kidney|Testes|Lung|Heart|Skeletal Muscle|Spleen|Pancreas
P35822	Ptprk	VLLTRPGEGGTGLPGPPLITR	Liver (both lobes)
P35922	Fmr1	TADGSLQSASSEGSR	Kidney
P35980	Rpl18	TAVVVGTVTDDVR	Liver (both lobes)|Brain|Kidney|Testes|Eye|Lung|Heart|Ovary|Skeletal Muscle|Spleen|Pancreas
P36552	Cpox	FGLFTPGSR	Skin|Spleen|Salivary Gland
P37040	Por	FAVFGLGNK	Testes|Spleen|Pancreas
P37804	Tagln	AAEDYGVIK	Skin|Lung|Heart|Ovary|White Adipose|Brown Adipose|Epididymis|Seminal Vesicles|Skeletal Muscle|Spleen|Pancreas
P38060	Hmgcl	SIVPTPVK	Kidney|Spleen|Pancreas
P39039	Mbl1	LFVTNHEK	Plasma
P39053	Dnm1	HIFALFNTEQR	Brain
P39876	Timp3	YQYLLTGR	Lung
P40124	Cap1	EPALLELEGK	Liver (both lobes)|Brain|Red Blood Cells|Skin|Lung|White Adipose|Spleen|Salivary Gland
P40142	Tkt	AVELAANTK	Plasma|Liver (both lobes)|Brain|Red Blood Cells|Kidney|Testes|Skin|Eye|Lung|Heart|Skeletal Muscle|Spleen|Pancreas
P40240	Cd9	ELQEFYK	Kidney|Ovary|Brown Adipose|Spleen|Pancreas
P40336	Vps26a	ELALPGELTQSR	Kidney|Pancreas|Salivary Gland
P41105	Rpl28	TVGVEPAADGK	Brain|Heart|Skeletal Muscle|Spleen|Pancreas
P41216	Acsl1	VLQPTIFPVVPR	Liver (both lobes)
P41317	Mbl2	DIAYLGITDVR	Plasma|Lung
P42125	Eci1	NVQELWLR	Ovary|Brown Adipose|Epididymis|Seminal Vesicles|Skeletal Muscle
P42225	Stat1	ELSAVTFPDIIR	Liver (both lobes)|Skin|Lung|Spleen|Salivary Gland
P42669	Pura	FFFDVGSNK	Skeletal Muscle|Spleen|Pancreas
P42703	Lifr	NTETNVFPQDK	Plasma
P42859	Htt	AFIANLK	Brain
P42925	Pxmp2	LYPVLTK	Liver (both lobes)|Brain|Lung
P42932	Cct8	FAEAFEAIPR	Liver (both lobes)|Brain|Red Blood Cells|Kidney|Testes|Eye|Lung|Heart|Skeletal Muscle
P43276	H1-5	ALAAGGYDVEK	Eye|Heart
P43404	Zap70	NVLLVNR	Skin|Spleen|Salivary Gland
P43883	Plin2	DSVASTVSGVVDK	Liver (both lobes)|Ovary
P45377	Akr1b8	ALGVSNFNHFQIER	Testes|Seminal Vesicles
P45878	Fkbp2	LVIPSELGYGER	Liver (both lobes)|Brain|Lung|Skeletal Muscle|Spleen|Pancreas
P45952	Acadm	TRPTVAAGAVGLAQR	Kidney|Skin|Skeletal Muscle|Spleen|Salivary Gland
P46061	Rangap1	VINLNDNTFTEK	Kidney|Salivary Gland
P46096	Syt1	VFVGYNSTGAELR	Brain|Kidney
P46412	Gpx3	QEPGENSEILPSLK	Plasma|Skin|Skeletal Muscle
P46460	Nsf	LLDYVPIGPR	Liver (both lobes)|Brain|Kidney|Lung|Spleen|Pancreas
P46638	Rab11b	NILTEIYR	Liver (both lobes)|Brain|Red Blood Cells|Skin|Lung|Spleen|Salivary Gland
P46664	Adss2	FIEDELQIPVK	Liver (both lobes)|Epididymis|Seminal Vesicles
P46935	Nedd4	EGFFELIPQDLIK	Liver (both lobes)|Brain|Lung|Skeletal Muscle|Spleen|Pancreas
P46978	Stt3a	ENDYYTPTGEFR	Testes|Heart
P47199	Cryz	AAQAHEDIIHGSGK	Liver (both lobes)|Brain|Kidney|Testes
P47713	Pla2g4a	VLGVSGSQNK	Kidney
P47754	Capza2	EGAAHAFAQYNLDQFTPVK	Testes|Skin|Lung|White Adipose
P47757	Capzb	DIVNGLR	Liver (both lobes)|Epididymis|Seminal Vesicles
P47791	Gsr	VGIQTDEK	Plasma
P47802	Mtx1	NYVEVTR	Lung
P47857	Pfkm	DQTDFEHR	Kidney|Pancreas|Salivary Gland
P47878	Igfbp3	FHPLHAK	Plasma
P47878	Igfbp3	FLNVLSPR	Red Blood Cells
P47880	Igfbp6	ENEEAPLR	Plasma
P47911	Rpl6	YYPTEDVPR	Liver (both lobes)|Brain|Lung|Spleen|Pancreas
P47931	Fst	EQPELEVQYQGK	Seminal Vesicles
P47934	Crat	SASIDSLAFVK	Spleen|Pancreas
P47941	Crkl	IGDQEFDHLPALLEFYK	Brain|Skin|Lung|Spleen|Salivary Gland
P47962	Rpl5	GAVDGGLSIPHSTK	Eye|Lung|Heart|Ovary
P48036	Anxa5	ETSGNLEQLLLAVVK	Brain|Kidney|Skin|Epididymis|Seminal Vesicles|Spleen|Salivary Gland
P48193	Epb41	DVPIVHTETK	Ovary|Brown Adipose
P48356	Lepr	VTFSNLK	Plasma
P48428	Tbca	QAEILQESR	Spleen|Pancreas
P48678	Lmna	TLEGELHDLR	Liver (both lobes)|Skin|Skeletal Muscle
P48754	Brca1	AVVGIVSK	Liver (both lobes)
P48758	Cbr1	TNFFGTR	Brain|Epididymis|Seminal Vesicles
P48758	Cbr1	FSGDVVLAAR	Liver (both lobes)|Brain|Red Blood Cells|Kidney|Eye|Lung|Heart
P48759	Ptx3	LAADTVVSLGR	Ovary
P48771	Cox7a2	GGASDALLYR	Testes|Heart
P48962	Slc25a4	DFLAGGIAAAVSK	Skin|Skeletal Muscle|Spleen|Salivary Gland
P49182	Serpind1	GETHEEVHSVLHFR	Plasma
P49222	Epb42	SVLPISQTQAAQEGALLYK	Skin|Lung|Spleen|Salivary Gland
P49442	Inpp1	TLADVLVQEVIK	Liver (both lobes)|Brain|Kidney|Lung
P49615	Cdk5	SFLFQLLK	Brain
P49722	Psma2	SILYDER	Plasma|Liver (both lobes)|Brain|Red Blood Cells|Testes
P49817	Cav1	HLNDDVVK	Testes|Heart
P50114	S100b	ELINNELSHFLEEIK	Liver (both lobes)|Brain
P50171	Hsd17b8	SALALVTGAGSGIGR	Heart|Skeletal Muscle
P50247	Ahcy	VPAINVNDSVTK	Liver (both lobes)|Brain|Red Blood Cells|Kidney|Testes|Eye|Lung|Heart|Skeletal Muscle
P50396	Gdi1	VVEGSFVYK	Liver (both lobes)|Brain|Red Blood Cells|Lung
P50405	Sftpb	VQAVIPK	Lung
P50462	Csrp3	NFGPTGIGFGGLTQQVEK	Skeletal Muscle
P50516	Atp6v1a	LPANHPLLTGQR	Brain|Red Blood Cells
P50516	Atp6v1a	VGHSELVGEIIR	Liver (both lobes)|Red Blood Cells|Skin|Eye|Heart|Skeletal Muscle|Spleen|Salivary Gland
P50518	Atp6v1e1	GALFGANANR	Lung
P50543	S100a11	DPGVLDR	Plasma|Heart
P50544	Acadvl	IFEGANDILR	Spleen|Pancreas
P50580	Pa2g4	HELLQPFNVLYEK	Liver (both lobes)|Brain|Red Blood Cells
P51125	Cast	GVVPEDAVETLAGSLGTR	Plasma|Red Blood Cells|Skeletal Muscle
P51150	Rab7a	VIILGDSGVGK	Liver (both lobes)|Brain|Lung|Epididymis
P51174	Acadl	TVAHIQTVQHK	Kidney|Epididymis|Seminal Vesicles|Skeletal Muscle|Spleen|Pancreas
P51180	Mip	SFAPAILTR	Eye|Heart
P51410	Rpl9	DFNHINVELSLLGK	Lung|Skeletal Muscle
P51658	Hsd17b2	DIQHAISAR	Liver (both lobes)
P51855	Gss	VGLLEALLPGQPEAVAR	Liver (both lobes)|Brain|Red Blood Cells|Kidney|Skin|Eye|Heart|Spleen|Salivary Gland
P51859	Hdgf	DLFPYEESK	Liver (both lobes)|Brain|Eye|Lung|Heart|Ovary
P51863	Atp6v0d1	LLFEGAGSNPGDK	Brain
P51881	Slc25a5	AAYFGIYDTAK	Brain|Epididymis|Seminal Vesicles|Spleen|Pancreas
P51885	Lum	FTGLQYLR	Plasma|Heart|White Adipose|Brown Adipose|Epididymis|Seminal Vesicles|Skeletal Muscle
P51910	Apod	IPASFEK	Plasma
P52194	Clgn	LLADTGDLILENFYDK	Testes
P52430	Pon1	YVYIAELLAHK	Plasma|Lung
P52480	Pkm	GSGTAEVELK	Plasma|Liver (both lobes)|Brain|Kidney|Testes|Skin|Eye|Lung|Heart|Skeletal Muscle|Spleen|Pancreas
P52480|P53657	Pkm|Pklr	GDLGIEIPAEK	Plasma|Liver (both lobes)|Red Blood Cells|Kidney|Eye|Heart|Spleen|Pancreas
P52503	Ndufs6	ITHTGQVYDEK	Testes|Heart|Skeletal Muscle|Spleen|Pancreas
P52795	Efnb1	GGSGTAGTEPSDIIIPLR	Lung
P52843	Sult2a1	EDQVTNGLK	Liver (both lobes)
P53026	Rpl10a	ILGPGLNK	Liver (both lobes)|Brain|Kidney|Testes|Lung|Ovary|Skeletal Muscle|Spleen|Pancreas
P53395	Dbt	EDILSFLEK	Kidney|Pancreas|Salivary Gland
P53798	Fdft1	YLNQTSR	Ovary
P53808	Pctp	LLDQPSGLYEYK	Kidney
P53811	Pitpnb	TVEIVHIDIADR	Lung
P53986	Slc16a1	SITVFFK	Liver (both lobes)|Red Blood Cells|Testes
P53994	Rab2a	TASNVEEAFINTAK	Liver (both lobes)|Lung|Skeletal Muscle|Spleen|Pancreas
P54310	Lipe	DLGQPVTLK	Liver (both lobes)|Kidney
P54726	Rad23a	ILSDDVPIK	Liver (both lobes)|Brain|Red Blood Cells|Kidney|Testes
P54728	Rad23b	ILSDDTALK	Brain|Skin|Lung|Skeletal Muscle|Spleen|Salivary Gland
P54729	Nub1	ELYIDPSK	Testes|Heart
P54822	Adsl	AFIITGQTYTR	Liver (both lobes)|Red Blood Cells|Lung|Skeletal Muscle|Spleen|Pancreas
P54869	Hmgcs2	YTVGLGQTR	Liver (both lobes)
P55065	Pltp	VTSAALDLVK	Plasma
P55066	Ncan	ELGGEVFYVGPAR	Brain
P55096	Abcd3	EYLDNVQLGHILER	Liver (both lobes)
P55258	Rab8a	LALDYGIK	Skin|Spleen|Salivary Gland
P55264	Adk	YSLKPNDQILAEDK	Liver (both lobes)|Brain|Red Blood Cells|Lung
P55284	Cdh5	SIGYSIR	Plasma|Testes
P55302	Lrpap1	LAELHSDLK	Plasma
P56213	Gfer	FSFLPGGAR	Liver (both lobes)
P56376	Acyp1	GTVQGQLQGPVSK	Epididymis|Spleen|Pancreas
P56380	Nudt2	ELNYVAR	Liver (both lobes)|Brain|Kidney|Testes|Lung
P56392	Cox7a1	LFQADNDLPVHLK	Kidney|Salivary Gland
P56395	Cyb5a	FLEEHPGGEEVLR	Liver (both lobes)|Brain|Red Blood Cells|Lung|Heart|Ovary|White Adipose
P56480	Atp5f1b	IGLFGGAGVGK	Plasma|Liver (both lobes)|Brain|Kidney|Testes|Eye|Lung
P56564	Slc1a3	IVQVTAADAFLDLIR	Liver (both lobes)
P56657	Cyp2c40	VQEEIDNVIGR	Liver (both lobes)
P56695	Wfs1	SAGEAAAPEPR	Heart
P56812	Pdcd5	LAELQAK	Brain|Red Blood Cells|Lung
P56959	Fus	EFSGNPIK	Liver (both lobes)|Brain
P57080	Usp25	LTDFLPK	Testes
P57722	Pcbp3	IVTITGPTDAIFK	Liver (both lobes)|Brain|Kidney|Testes
P57759	Erp29	SLNILTAFR	Liver (both lobes)|Brain|Kidney|Epididymis
P58137	Acot8	VAAQEVPIEIK	Kidney
P58252	Eef2	AGIIASAR	Brain|Red Blood Cells|Skin|Eye|Lung|Heart|Epididymis|Seminal Vesicles|Skeletal Muscle
P58389	Ptpa	LVALLDTLDR	Liver (both lobes)|Brain|Red Blood Cells|Kidney|Testes|Lung|Skeletal Muscle
P58710	Gulo	VVAHYPVEVR	Liver (both lobes)
P58771	Tpm1	LVIIESDLER	Plasma|Red Blood Cells|Lung|Skeletal Muscle
P58774	Tpm2	LVILEGELER	Skin|Eye|Lung|Heart|Skeletal Muscle|Spleen|Salivary Gland
P58802	Tbc1d10a	YLPGYYSEK	Plasma
P59325	Eif5	VNILFDFVK	Brain|Lung|Skeletal Muscle
P59999	Arpc4	AENFFILR	Epididymis|Skeletal Muscle|Spleen|Pancreas
P60229	Eif3e	YLTTAVITNK	Plasma|Liver (both lobes)|Brain|Kidney|Skeletal Muscle|Spleen|Pancreas
P60229	Eif3e	QLQAETEPIVK	Skin|Ovary|Brown Adipose|Spleen|Salivary Gland
P60334	Cdo1	TLADLIR	Liver (both lobes)
P60335	Pcbp1	IITLTGPTNAIFK	Brain|Red Blood Cells|Kidney|Skeletal Muscle
P60710|P63260	Actb|Actg	VAPEEHPVLLTEAPLNPK	Plasma|Lung
P60755	Mdga2	LLSPVFSIAPK	Red Blood Cells|Lung
P60843	Eif4a1	DQIYDIFQK	Plasma|Liver (both lobes)|Red Blood Cells|Skin|Lung|White Adipose|Brown Adipose|Spleen|Salivary Gland
P60867	Rps20	LIDLHSPSEIVK	Plasma|Brain|Skeletal Muscle
P61027	Rab10	AFLTLAEDILR	Liver (both lobes)|Brain|Red Blood Cells|Lung|Skeletal Muscle
P61082	Ube2m	GGYIGSTYFER	Brain
P61087	Ube2k	VDLVDENFTELR	Kidney|Pancreas|Salivary Gland
P61089	Ube2n	TNEAQAIETAR	Plasma|Liver (both lobes)|Brain|Red Blood Cells|Kidney|Testes|Skin|Lung|Ovary|Skeletal Muscle|Spleen|Salivary Gland
P61148	Fgf1	LEENHYNTYTSK	Kidney
P61161	Actr2	VGNIEIK	Liver (both lobes)|Lung
P61211	Arl1	ILILGLDGAGK	Testes
P61222	Abce1	LKPDEGGEVPVLNVSYKPQK	Heart
P61264	Stx1b	AIEQSIEQEEGLNR	Brain
P61358	Rpl27	VVLVLAGR	Liver (both lobes)|Brain
P61407	Tdrd6	EIQEAAATR	Testes|Heart
P61458	Pcbd1	DQLLPNLR	Brain|Kidney
P61514	Rpl37a	IEISQHAK	Skin|Spleen|Salivary Gland
P61620	Sec61a1	AFSPTTVNTGR	Lung
P61759	Vbp1	GQIPEIK	Kidney|Pancreas|Salivary Gland
P61804	Dad1	FLEEYLSSTPQR	Liver (both lobes)|Testes
P61922	Abat	EDLLNNVAR	Liver (both lobes)
P61939	Serpina7	AVLHIGEEGTK	Plasma
P61961	Ufm1	FAAEEFK	Brain|Testes|Seminal Vesicles
P61971	Nutf2	LSSLPFQK	Liver (both lobes)|Brain|Red Blood Cells|Skeletal Muscle
P61979	Hnrnpk	IDEPLEGSEDR	Kidney|Ovary|Skeletal Muscle|Spleen|Pancreas
P61982	Ywhag	AYSEAHEISK	Brain|Skin|Eye|Lung|Heart|Spleen|Salivary Gland
P62082	Rps7	AIIIFVPVPQLK	Brain|Kidney|Eye|Heart|Skeletal Muscle
P62137	Ppp1ca	LNLDSIIGR	Brain|Skeletal Muscle
P62196	Psmc5	FIGEGAR	Brain|Red Blood Cells|Kidney|Spleen|Pancreas
P62242	Rps8	ADGYVLEGK	Kidney|Ovary|Spleen|Pancreas
P62259	Ywhae	YLAEFATGNDR	Liver (both lobes)|Brain|Eye|Lung|Heart
P62264	Rps14	TPGPGAQSALR	Brain|Skeletal Muscle
P62267	Rps23	GHAVGDIPGVR	Liver (both lobes)|Brain|Kidney|Testes
P62270	Rps18	VLNTNIDGR	Liver (both lobes)|Skeletal Muscle
P62281	Rps11	DYLHYIR	Brain|Kidney
P62301	Rps13	GLAPDLPEDLYHLIK	Liver (both lobes)|Brain|Lung|Ovary|Skeletal Muscle
P62320	Snrpd3	VAQLEQVYIR	Brain
P62334	Psmc6	ALQSVGQIVGEVLK	Brain|Red Blood Cells|Kidney|Lung|Spleen|Pancreas
P62631	Eef1a2	YYITIIDAPGHR	Brain|Heart
P62696	Crybb2	IILYENPNFTGK	Eye|Heart
P62702	Rps4x	VNDTIQIDLETGK	Kidney|Pancreas|Salivary Gland
P62717	Rpl18a	IFAPNHVVAK	Liver (both lobes)
P62748	Hpcal1	LRPEVLQDLR	Heart
P62751	Rpl23a	LYDIDVAK	Brain
P62754	Rps6	LIEVDDER	Liver (both lobes)|Brain|Skeletal Muscle|Spleen|Pancreas
P62774	Mtpn	NGDLDEVK	Brain|Red Blood Cells|Skin|Lung
P62806	H4c1	VFLENVIR	Plasma|Red Blood Cells|Eye|Lung|Heart|Brown Adipose
P62821	Rab1A	VVDYTTAK	Kidney|Pancreas|Salivary Gland
P62827	Ran	NLQYYDISAK	Plasma|Liver (both lobes)|Brain|Red Blood Cells|Kidney|Testes|Skin|Eye|Lung|Heart|Ovary|White Adipose|Brown Adipose
P62830	Rpl23	GSAITGPVAK	Liver (both lobes)|Brain|Lung
P62838	Ube2d2	ELNDLAR	Kidney|Ovary|Brown Adipose|Spleen|Pancreas
P62852	Rps25	AALQELLSK	Kidney|Pancreas|Salivary Gland
P62858	Rps28	EGDVLTLLESER	Brain|Kidney
P62869	Elob	DDQLLDDGK	Brain|Kidney
P62889	Rpl30	YVLGYK	Kidney|Pancreas|Salivary Gland
P62897	Cycs	TGPNLHGLFGR	Plasma|Liver (both lobes)|Brain|Kidney|Testes|Lung|Ovary
P62900	Rpl31	LYTLVTYVPVTTFK	Brain|Heart|Skeletal Muscle
P62908	Rps3	AELNEFLTR	Brain|Skin|Skeletal Muscle
P62911	Rpl32	FLVHNVK	Liver (both lobes)
P62918	Rpl8	AVVGVVAGGGR	Liver (both lobes)|Brain|Testes|Lung|Skeletal Muscle
P62960	Ybx1	GAEAANVTGPGGVPVQGSK	Liver (both lobes)|Kidney|Lung|Ovary|Skeletal Muscle|Spleen |Pancreas
P62962	Pfn1	SSFFVNGLTLGGQK	Plasma|Liver (both lobes)|Brain|Red Blood Cells|Kidney|Testes|Skin|Eye|Lung|Heart|Ovary
P63001	Rac1	EIGAVK	Skin|Ovary|Brown Adipose|Spleen|Salivary Gland
P63017	Hspa8	DAGTIAGLNVLR	Eye
P63037	Dnaja1	TIVITSHPGQIVK	Liver (both lobes)|Brain|Testes|Skin|Seminal Vesicles|Spleen|Salivary Gland
P63038	Hspd1	NAGVEGSLIVEK	Brain|Lung
P63038	Hspd1	GIIDPTK	Plasma|Brain|Kidney|Heart|Skeletal Muscle|Spleen|Pancreas
P63073	Eif4e	IVIGYQSHADTATK	Liver (both lobes)|Brain|Red Blood Cells|Kidney|Seminal Vesicles
P63101	Ywhaz	FLIPNASQPESK	Liver (both lobes)|Brain|Red Blood Cells|Testes|Eye|Lung|Heart|Epididymis|Seminal Vesicles
P63158	Hmgb1	GEHPGLSIGDVAK	Liver (both lobes)|Brain|Kidney|Skin|Lung|Heart|Ovary|Spleen|Salivary Gland
P63276	Rps17	LGNDFHTNK	Skin|Brown Adipose|Spleen|Salivary Gland
P63280	Ube2i	DHPFGFVAVPTK	Skin|Ovary|Brown Adipose|Spleen|Salivary Gland
P63323	Rps12	DVIEEYFK	Brain|Lung
P63325	Rps10	IAIYELLFK	Brain|Lung|White Adipose|Brown Adipose|Skeletal Muscle
P63328	Ppp3ca	TQEHFTHNTVR	Testes
P67984	Rpl22	AGNLGGGVVTIER	Heart|Skeletal Muscle
P68033|P68134|P63268|P62737|P60710|P63260	Actc1|Acta1|Actg2|Acta2|Actb|Actg1	VAPEEHPTLLTEAPLNPK	Plasma|Lung|Heart
P68037	Ube2l3	IYHPNIDEK	Brain|Red Blood Cells|Skin|Lung|Epididymis|Seminal Vesicles
P68254	Ywhaq	AVTEQGAELSNEER	Brain|Eye|Lung|Heart|Ovary
P68368	Tuba4a	AVFVDLEPTVIDEIR	Lung|Skeletal Muscle
P68510	Ywhah	AVTELNEPLSNEDR	Brain|Skin|Eye|Lung|Heart
P70168	Kpnb1	LAATNALLNSLEFTK	Liver (both lobes)|Brain|Testes|Lung
P70195	Psmb7	GTTAVLTEK	Red Blood Cells|Skin|Lung|Skeletal Muscle|Spleen|Salivary Gland
P70202	Lxn	FSVEEIIQK	Brain
P70271	Pdlim4	DFSAPLTISR	Skin|Spleen|Salivary Gland
P70274	Selenop	QVSEHIAVYR	Plasma
P70290	Mpp1	IAILDIEPQTLK	Brain|Red Blood Cells|Skin|Spleen|Salivary Gland
P70296	Pebp1	LYEQLSGK	Plasma|Brain|Red Blood Cells|Kidney|Testes|Skin|Eye|Lung|Heart
P70312	Has2	LTYPGIK	Ovary
P70315	Was	AGISEAQLTDAETSK	Skin|Spleen|Salivary Gland
P70335	Rock1	DIEVEPVQQGEK	Skin|Spleen|Salivary Gland
P70349	Hint1	IIFEDDR	Liver (both lobes)|Brain
P70372	Elavl1	SLFSSIGEVESAK	Liver (both lobes)
P70375	F7	SFSENTLAR	Plasma|Testes
P70389	Igfals	DFALQNPGVVPR	Plasma
P70398	Usp9x	NHQNLLDSLEQYVK	Liver (both lobes)|Brain|Red Blood Cells|Lung
P70402	Mybph	SGDQDSILFIR	Brown Adipose|Skeletal Muscle
P70406	Ucp2	GTSPNVAR	Liver (both lobes)
P70414	Slc8a1	GNVIIPYK	Heart
P70441	Slc9a3r1	SGLLAGDR	Brain|Kidney|Testes|Skin|Seminal Vesicles|Spleen|Salivary Gland
P70663	Sparcl1	LLAGDHPIELLLR	Plasma|Brain
P70670	Naca	DPASPVTSLVVPAAHK	Skeletal Muscle
P70677	Casp3	SGTDVDAANLR	Pancreas|Salivary Gland
P70694	Akr1c6	IAIDAGFR	Ovary
P70695	Fbp2	EAVITAQER	Kidney|Brown Adipose
P70697	Urod	VGAFVDAVHK	Kidney|Pancreas|Salivary Gland
P70699	Gaa	GTRPFVISR	Brain
P80313	Cct7	LLDVVHPAAK	Liver (both lobes)|Brain|Red Blood Cells|Kidney|Testes|Skin|Ovary|Spleen|Salivary Gland
P80314	Cct2	LALVTGGEIASTFDHPELVK	Liver (both lobes)|Brain|Red Blood Cells|Skin|Spleen|Salivary Gland
P80315	Cct4	GIHPTIISESFQK	Liver (both lobes)|Brain|Red Blood Cells|Skin|Eye|Lung|Heart|Ovary|White Adipose|Spleen|Salivary Gland
P80316	Cct5	DVDFELIK	Liver (both lobes)|Brain|Red Blood Cells|Lung|Ovary|Skeletal Muscle
P80318	Cct3	TAVETAVLLLR	Liver (both lobes)|Brain|Red Blood Cells|Kidney|Testes|Skin|Ovary|Spleen|Salivary Gland
P80560	Ptprn2	EIDIAATLEHLR	Brain
P83917	Cbx1	NSDEADLVPAK	Kidney|Spleen|Pancreas
P84091	Ap2m1	LNYSDHDVIK	Brain|Red Blood Cells|Testes
P84096	Rhog	EQGQAPITPQQGQALAK	Kidney
P84099	Rpl19	LLADQAEAR	Brain|Skin|Heart|Spleen|Salivary Gland
P97290	Serping1	LSEALTDFSVK	Plasma
P97298	Serpinf1	LTFPLDYHLNQPFLFVLR	Plasma
P97311	Mcm6	DFYVAFQDLPTR	Testes
P97315	Csrp1	GESLGIK	Brain|Lung|White Adipose|Brown Adipose|Epididymis|Seminal Vesicles
P97321	Fap	LGVYEVEDQLTAVR	Lung
P97333	Nrp1	IAPSPVVSSGPFLFIK	Lung
P97351	Rps3a	TSYAQHQQVR	Liver (both lobes)|Skin|Spleen|Salivary Gland
P97371	Psme1	EPALNEANLSNLK	Liver (both lobes)|Brain|Red Blood Cells|Lung|Ovary
P97372	Psme2	DEAAYGALR	Plasma|Red Blood Cells|Lung
P97443	Smyd1	AYAILLVTHGPSHPITK	Skeletal Muscle
P97447	Fhl1	AIVAGDQNVEYK	Liver (both lobes)|Brain|Kidney|Lung|Epididymis|Seminal Vesicles|Skeletal Muscle
P97449	Anpep	ADNSATGFGTGTR	Liver (both lobes)
P97461	Rps5	QAVDVSPLR	Liver (both lobes)|Brain|Lung
P97464	Ext1	FTAVIHAVTPLVSQSQPVLK	Plasma
P97494	Gclc	YDSIDSYLSK	Red Blood Cells|Testes|Lung|Ovary
P97497	Shbg	VVLSQGPK	Testes|Seminal Vesicles
P97742	Cpt1a	IPGEETDTIQHVK	Kidney|Salivary Gland
P97807	Fh	YYGAQTVR	Liver (both lobes)|Brain|Red Blood Cells|Kidney|Testes|Lung
P97822	Anp32e	DLSTVEALQNLK	Eye|Lung|Heart
P97823	Lypla1	ASFSQGPINSANR	Skeletal Muscle
P97872	Fmo5	HGYPIDLLLSSR	Liver (both lobes)
P97927	Lama4	LAALSIEESK	Brown Adipose
P97953	Vegfc	SIDNEWR	Ovary
P98064	Masp1	SPEPISTQTHSVQILFR	Plasma
P98078	Dab2	LIGIDDVPDAR	Epididymis|Seminal Vesicles
P98086	C1qa	DQPRPAFSAIR	Plasma
P99024	Tubb5	ALTVPELTQQVFDAK	Skin|Eye|Lung|Heart|Ovary
P99026	Psmb4	FQIATVTEK	Plasma|Liver (both lobes)|Brain|Red Blood Cells|Kidney|Testes|Skin|Heart|White Adipose|Brown Adipose
P99027	Rplp2	NIEDVIAQGVGK	Liver (both lobes)|Brain|Red Blood Cells|Skin|Eye|Lung|Heart|Ovary
P99029	Prdx5	VNLAELFK	Kidney|Pancreas|Salivary Gland
Q00519	Xdh	NNSFYGPEVK	Lung
Q00623	Apoa1	SNPTLNEYHTR	Plasma|Brain|Red Blood Cells|Skin|Lung|Heart|Ovary|White Adipose|Spleen|Salivary Gland
Q00724	Rbp4	DPNGLSPETR	Plasma|White Adipose|Brown Adipose
Q00897	Serpina1d	ELISQFLLNR	Plasma|Liver (both lobes)|Brain|Red Blood Cells|Skin|Lung|Heart|Ovary|Spleen|Salivary Gland
Q00898	Serpina1e	LAQIHIPR	Plasma|Red Blood Cells|White Adipose|Brown Adipose|Epididymis|Seminal Vesicles
Q00PI9	Hnrnpul2	NYYGYQGYR	Brain|Red Blood Cells|Skin|Spleen|Salivary Gland
Q01102	Selp	GITSLPAPAVR	Plasma
Q01149	Col1a2	GVVGPQGAR	Plasma|Heart
Q01279	Egfr	IPLENLQIIR	Plasma|Ovary
Q01320	Top2a	TLAVSGLGVVGR	Lung
Q01339	Apoh	YTSFEYPK	Plasma
Q01730	Rsu1	DNDLISLPK	Liver (both lobes)|Lung|Skeletal Muscle
Q01768	Nme2	NIIHGSDSVESAEK	Brain|Kidney|Lung|Ovary|White Adipose
Q01853	Vcp	LAGESESNLR	Brain|Red Blood Cells|Skin|Eye|Lung|Heart|Epididymis|Skeletal Muscle
Q02053	Uba1	LAGTQPLEVLEAVQR	Red Blood Cells|Epididymis|Seminal Vesicles
Q02105	C1qc	FNSVVTNPQGHYNPSTGK	Plasma|Liver (both lobes)|Brain|Kidney
Q02257	Jup	HVAAGTQQPYTDGVR	Brain|Lung
Q02357	Ank1	ELLDFVPK	Red Blood Cells|Kidney|Skin|Lung|Spleen|Salivary Gland
Q02566	Myh6	GQSVQQVYYSIGALAK	Kidney
Q02596	Glycam1	DNVVIESTKPENQEAQDGLR	Plasma
Q02788	Col6a2	NFVINVVNR	Kidney|Pancreas|Salivary Gland
Q02819	Nucb1	VNVPGSQAQLK	Plasma|Liver (both lobes)|Brain|Kidney|Skin|Lung|White Adipose|Brown Adipose|Spleen|Salivary Gland
Q02858	Tek	YIGGNLFTSAFTR	Plasma
Q03265	Atp5f1a	ILGADTSVDLEETGR	Brain|Testes|Lung|Ovary|Epididymis|Seminal Vesicles|Skeletal Muscle
Q03311	Bche	YLTLNTEK	Plasma
Q03734	Serpina3m	FSISTDYNLK	Plasma|Red Blood Cells
Q03958	Pfdn6	LDYITAEIK	Brain
Q04447	Ckb	DLFDPIIEER	Brain|Skin|Eye|Lung|Heart|Ovary|White Adipose|Brown Adipose|Epididymis|Seminal Vesicles
Q05421	Cyp2e1	LHEEIDR	Liver (both lobes)
Q05793	Hspg2	IEGNTLVIPR	Skin|Spleen|Salivary Gland
Q05816	Fabp5	ELGVGLALR	Lung|White Adipose|Brown Adipose
Q05816|Q0VBN2	Fabp5|Dsel	ESTITR	White Adipose
Q05909	Ptprg	AYIATQGPLK	Lung
Q05920	Pc	VVHSYEELEENYTR	Kidney
Q05D44	Eif5b	TSEVPYAGINIGPVHK	Liver (both lobes)|Lung
Q06318	Scgb1a1	LVDTLPQETR	Plasma|Lung|Heart
Q06770	Serpina6	DTPLTLTVLHK	Plasma|Kidney|Skeletal Muscle
Q06806	Tie1	VLYVHNSPGAHLFPDK	Plasma
Q06890	Clu	SLLNSLEEAK	Plasma|Liver (both lobes)|Brain|Kidney|Testes|White Adipose|Brown Adipose
Q07076	Anxa7	EFSGYVESGLK	Brain|Red Blood Cells|Skeletal Muscle
Q07079	Igfbp5	FVGGAENTAHPR	Kidney
Q07235	Serpine2	FTAVAQTDLK	Epididymis|Seminal Vesicles
Q07417	Acads	ELVPIAAQLDR	Liver (both lobes)|Testes|Heart|Skeletal Muscle
Q07456	Ambp	DSLLQEFK	Plasma
Q07968	F13b	IAQYYYTFK	Plasma
Q08091	Cnn1	GPAYGLSAEVK	Lung|Epididymis|Seminal Vesicles
Q08642	Padi2	ILIGSSFPLSGGR	Brain|Kidney|Skeletal Muscle
Q08761	Pros1	FSAEFDFR	Plasma
Q08857	Cd36	EVVLEEGTTAFK	Spleen|Pancreas
Q0HA38	Ttc21b	LLLQDNHNVEALR	Testes
Q0VAV2	Exph5	ILQVLER	Skin|Heart|Spleen|Salivary Gland
Q0VAX3	Fads2p1	AFGDIVR	Liver (both lobes)
Q11011	Npepps	VLGATLSPELIQK	Liver (both lobes)|Brain|Testes|Skin|Eye|Lung|Heart|Spleen|Salivary Gland
Q11136	Pepd	STLFVPR	Liver (both lobes)|Brain
Q18PI6	Cd84	IEIIDQK	Lung
Q19LI2	A1bg	TPFAVASTR	Plasma|White Adipose|Brown Adipose
Q1ERP8	Cd300lg	EISGFEGDTVSLR	Lung|Heart
Q1XH17	Trim72	TVAVLEHQLVEVEETVR	Skeletal Muscle
Q283N4	Urad	LTDLLGAHSHSAR	Liver (both lobes)
Q2NL51	Gsk3a	VTTVVATVGQGPER	Brain|Testes
Q2TPA8	Hsdl2	DGANIVIAAK	Brain|Kidney|Heart
Q32Q92	Acot6	GPNIGLIGVSK	Lung
Q3SXB8	Colec11	EGAFVYSDR	Plasma
Q3TBD2	Arhgap45	GEEPDVR	Skin|Spleen|Salivary Gland
Q3TCH7	Cul4a	TLGHNLLVSELYNQLK	Liver (both lobes)|Brain|Kidney|Testes|Lung
Q3TCJ1	Abraxas2	ISLAIPNLGNTSQQEYK	Brain|Lung
Q3THK7	Gmps	SGNIVAGIANESK	Liver (both lobes)|Brain|Testes|Lung
Q3THS6	Mat2a	ELLEIVK	Kidney|Pancreas
Q3TJZ6	Fam98a	IEAINQAIANEYEVR	Brain
Q3TMH2	Scrn3	NISNQLSITTK	Red Blood Cells|Eye|Heart|Ovary|Brown Adipose|Skeletal Muscle
Q3TPX4	Exoc5	LHLIAQELPFDR	Brain
Q3TTY5	Krt2	VDPEIQNVK	Plasma
Q3TVI8	Pbxip1	ALESELQQLR	Epididymis
Q3TW96	Uap1l1	EEEFSPLK	Lung
Q3TXS7	Psmd1	DTSEDVEELVEPVAAHGPK	Liver (both lobes)|Brain|Kidney|Lung|Skeletal Muscle|Spleen|Pancreas
Q3U0B3	Dhrs11	SAGYPGTLIPYR	Red Blood Cells
Q3U1J4	Ddb1	LEELHVIDVK	Red Blood Cells|Skeletal Muscle
Q3U2P1	Sec24a	DLVQLPVVTSSTIVR	Liver (both lobes)|Skin|Spleen|Salivary Gland
Q3U5Q7	Cmpk2	TTLTQSVSESLK	Kidney|Pancreas
Q3UBX0	Tmem109	ETSADILTQIGR	Brown Adipose
Q3UGR5	Hdhd2	LLLDGAPLIAIHK	Liver (both lobes)|Brain|Testes|Lung|Skeletal Muscle
Q3UGY8	Arfgef3	HSFSAGPELLR	Liver (both lobes)|Seminal Vesicles
Q3UHD3	Mtus2	IDQNTVVTR	Heart
Q3UHJ0	Aak1	LTAEELLNK	Spleen|Pancreas
Q3UHX2	Pdap1	GVEGLIDIENPNR	Liver (both lobes)|Brain|Lung
Q3UIU2	Ndufb6	DQELSPR	Brain|Heart
Q3UJU9	Rmdn3	AEELQPGFSK	Liver (both lobes)
Q3ULD5	Mccc2	ALVSQLHER	Skeletal Muscle
Q3ULL6	Upf3b	FLESYATDNEK	Liver (both lobes)
Q3ULL6	Upf3b	NQEDILLFR	Liver (both lobes)
Q3UM45	Ppp1r7	IEGLQSLVNLR	Plasma|Brain|Testes
Q3UMC0	Spata5	ALANESGLNFLAIK	Testes|Seminal Vesicles
Q3UP75	Ugt3a1	LIDEYAYGR	Kidney
Q3UPH1	Prrc1	SGGELDIVVTSNK	Kidney|Pancreas|Salivary Gland
Q3UQ44	Iqgap2	LPYDVTTEQALTYPEVK	Red Blood Cells
Q3URD3	Slmap	DDLQGTQSETEAK	Heart
Q3USB7	Plcl1	IANEYPEDFVNYNK	Brain
Q3UV17	Krt76	AQYEDIAQK	Plasma
Q3UZ09	C1rl	VVVHPDYR	Plasma|Red Blood Cells|White Adipose
Q3UZ09|Q8CFG9|Q8CG16	C1rl|C1rb|C1ra	GYGFYTK	Lung
Q3UZA1	Rcsd1	AEGTTIAEPDTK	Plasma
Q3UZZ6	Sult1d1	DIPEEILNK	Liver (both lobes)|Brain|Kidney
Q3V0K9	Pls1	EELEELQEAFNK	Kidney
Q3V1L4	Nt5c2	KPLFFGEGTVLR	Red Blood Cells|Lung
Q504N0	Cpa2	YSFAFELR	Spleen|Pancreas
Q505F5	Lrrc47	NALGPGLSPELGPLPALR	Brain|Lung
Q58A65	Spag9	VESLESQTR	Kidney|Pancreas|Salivary Gland
Q5EG47	Prkaa1	SIDDEITEAK	Kidney
Q5S003	Spag17	LTLPLIGK	Testes
Q5S006	Lrrk2	ALDLLLDSGK	Brain|Red Blood Cells
Q5SSL4	Abr	GIEEVGIYR	Brain
Q5SUR0	Pfas	FGEPVLAGFAR	Liver (both lobes)|Red Blood Cells|Lung
Q5SW19	Cluh	LGYEEHIPGQTR	Liver (both lobes)
Q5SX39	Myh4	LQDAEEHVEAVNSK	Skeletal Muscle
Q5SX40	Myh1	LQDAEEHVEAVNAK	Skeletal Muscle
Q5SXJ3	Brip1	ESASYSVTEVQLR	Testes
Q5XJY5	Arcn1	LFTAESLIGLK	Liver (both lobes)|Brain|Lung
Q5XKE0	Mybpc2	IAFQYGITDLR	Brown Adipose|Skeletal Muscle
Q60590	Orm1	GLSLYAK	Plasma|Lung|Heart|White Adipose|Brown Adipose
Q60597	Ogdh	THLTELQR	Kidney|Pancreas|Salivary Gland
Q60605	Myl6	EAFQLFDR	Plasma|Liver (both lobes)|Brain|Kidney|Testes|Skin|Lung|White Adipose|Brown Adipose
Q60631	Grb2	ATADDELSFK	Skeletal Muscle
Q60636	Prdm1	TFGQLSNLK	Lung
Q60648	Gm2a	IQSILSSGGK	Epididymis|Seminal Vesicles|Spleen|Pancreas
Q60668	Hnrnpd	LDPITGR	Ovary
Q60673	Ptprn	AEGPALFSR	Lung
Q60675	Lama2	SGFFNLQEDNQK	Plasma|Red Blood Cells
Q60676	Ppp5c	LLYPDHFHLLR	Brain|Skeletal Muscle
Q60692	Psmb6	TTTGSYIANR	Liver (both lobes)|Brain|Red Blood Cells|Lung|Skeletal Muscle
Q60750	Epha1	LQPDTTYIVR	Heart
Q60751	Igf1r	GNLLINIR	Liver (both lobes)
Q60759	Gcdh	HNPSNQSYTLSGTK	Kidney|Ovary|Brown Adipose|Skeletal Muscle
Q60847	Col12a1	TPDEEFK	Plasma
Q60854	Serpinb6	TGTQYLLR	Ovary|Brown Adipose|Epididymis|Seminal Vesicles|Skeletal Muscle|Spleen|Pancreas
Q60864	Stip1	LDPQNHVLYSNR	Liver (both lobes)|Brain|Red Blood Cells|Skin|Lung|Heart|White Adipose|Brown Adipose
Q60864	Stip1	HEANNLQLK	White Adipose
Q60865	Caprin1	YQEVTNNLEFAK	Skin|Ovary|Brown Adipose|Spleen|Salivary Gland
Q60928	Ggt1	VAPSPANFIKPGK	Ovary
Q60930	Vdac2	VNNSSLIGVGYTQTLRPGVK	Liver (both lobes)|Lung|Ovary|Seminal Vesicles|Skeletal Muscle
Q60931	Vdac3	LTLSALIDGK	Kidney|Pancreas|Salivary Gland
Q60932	Vdac1	VTQSNFAVGYK	Liver (both lobes)|Brain|Testes|Skeletal Muscle
Q60963	Pla2g7	VAIDLTNK	Plasma
Q60994	Adipoq	SAFSVGLETR	Plasma|White Adipose|Brown Adipose
Q60994	Adipoq	AVLFTYDQYQEK	White Adipose|Brown Adipose
Q61012	Gngt1	DYIEER	Lung
Q61024	Asns	VEPFLPGHYEVLDLKPNGK	Liver (both lobes)|Testes
Q61081	Cdc37	ELEVAESDGQVELER	Kidney|Salivary Gland
Q61129	Cfi	TEGLVQVK	Plasma|Skin|White Adipose|Brown Adipose
Q61133	Gstt2	VLGPLIGVQVPQEK	Kidney
Q61147	Cp	DIFTGLIGPMK	Plasma|Skin|Heart|White Adipose
Q61160	Fadd	ELLASLR	Liver (both lobes)
Q61166	Mapre1	LEHEYIQNFK	Brain|Lung|Seminal Vesicles
Q61171	Prdx2	NDEGIAYR	Plasma|Brain|Red Blood Cells|Kidney|Skin|Lung|Heart
Q61176	Arg1	ANEELAGVVAEVQK	Plasma|Liver (both lobes)
Q61206	Pafah1b2	ELFSPLHALNFGIGGDTTR	Brain|Eye
Q61206	Pafah1b2	NGELENIKPK	Liver (both lobes)|Kidney|Skin|Lung|Spleen|Salivary Gland
Q61207	Psap	TVVTEAGNLLK	Ovary|Brown Adipose|Epididymis|Seminal Vesicles|Spleen|Pancreas
Q61233	Lcp1	VYALPEDLVEVNPK	Plasma|Skin|White Adipose|Brown Adipose|Epididymis
Q61247	Serpinf2	NPNPSALPQLQEQR	Plasma|Skin|Heart|White Adipose
Q61268	Apoc4	TQAWLQSSR	Plasma
Q61285	Abcd2	TEAFTTAR	Ovary
Q61316	Hspa4	AGGIETIANEYSDR	Brain|Red Blood Cells|Skin|Skeletal Muscle
Q61362	Chi3l1	LLLSAALSAGK	Lung
Q61398	Pcolce	YDALEVFAGSGTSGQR	Plasma
Q61400	Ceacam10	FITASNK	Liver (both lobes)
Q61425	Hadh	DTPGFIVNR	Liver (both lobes)|Skin|Ovary|Spleen|Salivary Gland
Q61468	Msln	TFLGGASVK	Plasma
Q61477	Nbl1	LALFPDK	Lung
Q61490	Alcam	SVQYDDVPEYK	Lung
Q61496	Ddx4	GGGLFGSR	Testes
Q61508	Ecm1	AGPAVPQEAIPLQK	Plasma
Q61554	Fbn1	AGYQSTLTR	Liver (both lobes)|Red Blood Cells|Skeletal Muscle
Q61584	Fxr1	VIQEIVDK	Skin|Spleen|Salivary Gland
Q61598	Gdi2	DLGTDSQIFISR	Brain|Red Blood Cells|Skin|Eye|Lung|Heart|Ovary|Epididymis|Seminal Vesicles
Q61599	Arhgdib	YVQHTYR	Lung
Q61646	Hp	NQLVEIEK	Plasma|Skin|Lung|Heart
Q61656	Ddx5	FVINYDYPNSSEDYIHR	Liver (both lobes)|Testes|Lung
Q61702	Itih1	FAHYVITSQVVNNADK	Plasma
Q61702	Itih1	AAVLGESAGLVR	Skin|Lung
Q61703	Itih2	VQFELHYQEVK	Plasma|Brain|Red Blood Cells|Skin
Q61704	Itih3	EVSFDVELPK	Plasma
Q61730	Il1rap	VAFPLEVVQK	Plasma
Q61753	Phgdh	GGIVDEGALLR	Brain|Red Blood Cells|Lung|Epididymis|Seminal Vesicles
Q61771	Kif3b	VVDVDVK	Skin|Spleen|Salivary Gland
Q61781	Krt14	ASLENNLEETK	Plasma
Q61792	Lasp1	QQSELQSQVR	Skin|Spleen|Salivary Gland
Q61823	Pdcd4	APQLVGQFIAR	Lung
Q61830	Mrc1	AYLTTVEDR	Skin|Lung
Q61838	Pzp	LSPQSIYNLLPGK	Plasma|Red Blood Cells
Q61937	Npm1	TVSLGAGAK	Liver (both lobes)|Lung
Q61990	Pcbp2	IITLAGPTNAIFK	Liver (both lobes)|Brain|Kidney|Testes|Lung
Q62000	Ogn	LEGNPIALGK	Skeletal Muscle
Q62009	Postn	LLYPADIPVGNDQLLELLNK	Lung
Q62077	Plcg1	LTDLEQR	Ovary
Q62087	Pon3	FVYVADVTAK	Plasma|White Adipose|Brown Adipose
Q62093	Srsf2	VGDVYIPR	Skin|Spleen|Salivary Gland
Q62165	Dag1	LVPVVNNR	Plasma
Q62167	Ddx3x	VVWVEEIDKR	Skeletal Muscle
Q62178	Sema4a	ALSFFQQK	Heart
Q62186	Ssr4	FFDEESYSLLR	Skin|Spleen|Salivary Gland
Q62188	Dpysl3	QIGDNLIVPGGVK	Brain
Q62189	Snrpa	TDSDIIAK	Skin|Spleen|Salivary Gland
Q62261	Sptbn1	EIGQSVDEVEK	Kidney|Pancreas|Salivary Gland
Q62348	Tsn	VVQSLEQTAR	Brain|Testes|Skin|Lung|Seminal Vesicles|Spleen|Salivary Gland
Q62351	Tfrc	VEYHFLSPYVSPR	Lung
Q62356	Fstl1	LSFQEFLK	Plasma
Q62393	Tpd52	TSETLSQAGQK	Skin|Spleen|Salivary Gland
Q62419	Sh3gl1	ASQLVSEK	Brain
Q62422	Ostf1	ALYTFEPR	Testes
Q62425	Ndufa4	FYSVNVDYSK	Heart|Skeletal Muscle
Q62446	Fkbp3	NAKPLSFK	Liver (both lobes)|Epididymis|Seminal Vesicles|Skeletal Muscle
Q62465	Vat1	TVENVTVFGTASASK	Brain
Q62468	Vil1	AAISDSVVEPAAK	Kidney
Q62469	Itga2	FVTGLDIGPK	Lung|Ovary
Q62523	Zyx	FAPVVAPKPK	Brain
Q63810	Ppp3r1	DTQLQQIVDK	Liver (both lobes)|Brain|Kidney|Skeletal Muscle
Q63836	Selenbp2	LTGQIFLGGSIVR	Liver (both lobes)
Q63880	Ces3a	AISQSGVVISK	Plasma
Q63886	Ugt1a1	VVYSPYGSLATEILQK	Liver (both lobes)
Q63918	Cavin2	GIQNDLTK	Plasma|Lung|White Adipose|Brown Adipose
Q63961	Eng	ILPGSEAGPR	Ovary
Q64133	Maoa	DVPALEITHTFLER	Brain|Kidney|Lung|Ovary
Q64310	Surf4	QYLPHVAR	Liver (both lobes)
Q64332	Syn2	FPLIEQTYYPNHR	Brain
Q64339	Isg15	IGVPAFQQR	Plasma|Red Blood Cells|Lung
Q64362	Aktip	HGLYQDGVFK	Liver (both lobes)
Q64374	Rgn	ITGLGVK	Liver (both lobes)
Q64435	Ugt1a6	EIVEHLSER	Liver (both lobes)
Q64437	Adh7	GVLADGTTR	Eye|Lung|Heart
Q64442	Sord	AVEAFETAK	Plasma|Liver (both lobes)|Brain|Red Blood Cells|Kidney|Testes|Lung
Q64446	Atp7b	ATHVGNDTTLAQIVK	Liver (both lobes)
Q64455	Ptprj	TSIVYK	Salivary Gland
Q64459	Cyp3a11	LQDEIDEALPNK	Liver (both lobes)
Q64514	Tpp2	DLPFIVSHR	Brain|Red Blood Cells|Testes|Skin|Lung|Spleen|Salivary Gland
Q64516	Gk	TQSTVENLSK	Kidney|Pancreas|Salivary Gland
Q64520	Guk1	DYYFVTR	Brain
Q64521	Gpd2	LVQDYGLESEVAQHLAK	Spleen|Pancreas
Q64674	Srm	YQDILVFR	Epididymis
Q64726	Azgp1	VIPGGNR	Plasma
Q64727	Vcl	ALASQLQDSLK	Plasma|Liver (both lobes)|Brain|Red Blood Cells|Kidney|Testes|Skin|Lung
Q64737	Gart	FEGAIYR	Liver (both lobes)|Brain|Lung
Q64739	Col11a2	GANEDELSPETSPYVK	Plasma
Q68FD5	Cltc	NNLAGAEELFAR	Liver (both lobes)|Brain|Kidney|Lung|Skeletal Muscle
Q68FH4	Galk2	LIEFSPLR	Heart
Q68FL4	Ahcyl2	IVLLAEGR	Lung
Q69Z99	Znf512	YTRPGLPTFSQEVLHK	Brain
Q69ZU6	Thsd7a	GEEGIQVR	Testes
Q6A065	Cep170	TLPQLPNEEK	Brain|Lung
Q6A4J8	Usp7	EVFGTFGIPFLLR	Liver (both lobes)
Q6F3F9	Adgrg6	TIDELAFK	Lung
Q6GQT1	A2m	IQEEGTGVEETGK	Plasma|Eye|Heart
Q6IFX2	Krt42	ALEEANADLEVK	Lung
Q6IRU2	Tpm4	TIDDLEEK	Red Blood Cells|Lung
Q6IRU5	Cltb	LQELDAASK	Kidney|Salivary Gland
Q6NVD9	Bfsp2	AEAGALLQAK	Kidney|Eye|Heart
Q6NVF9	Cpsf6	GAAPNVVYTYTGK	Testes|Lung
Q6NZB0	Dnajc8	ALDVIQAGK	Testes|Heart
Q6NZC7	Sec23ip	GFFNIYHPLDPVAYR	Testes
Q6NZJ6	Eif4g1	EAVGDLLDAFK	Kidney|Pancreas|Salivary Gland
Q6P069	Sri	LSPQTVNSVAK	Kidney
Q6P1B1	Xpnpep1	GSLTFEPLTLVPIQTK	Liver (both lobes)|Brain|Kidney|Lung|Skeletal Muscle
Q6P1F6	Ppp2r2a	VVIFQQEQENK	Liver (both lobes)|Brain|Kidney|Testes|Lung
Q6P253	Dmkn	AQPGLLK	Plasma
Q6P3A9|P61750|P62331|P61205|P84078|Q8BSL7|P84084	Arl11|Arf4|Arf6|Arf3|Arf1|Arf2|Arf5	TTILYK	Liver (both lobes)|Lung
Q6P5D8	Smchd1	IAHLAQIEDDR	Lung
Q6P5E4	Uggt1	VDALLSAQPK	Liver (both lobes)
Q6P5E8	Dgkq	EGNLPSGAR	Kidney
Q6P5F9	Xpo1	DFEEYPEHR	Liver (both lobes)
Q6P8U6	Pnlip	TFGAIGR	Skin|Spleen|Salivary Gland
Q6P8X1	Snx6	NLVELAELELK	Liver (both lobes)|Brain|Kidney|Skin|Lung|Spleen|Salivary Gland
Q6PA06	Atl2	NLVPLLLAPENLVEK	Liver (both lobes)|Brain|Kidney|Ovary
Q6PAM1	Txlna	YAELLEEHR	Liver (both lobes)
Q6PB66	Lrpprc	DLPITEAVFSALVTGHAR	Liver (both lobes)
Q6PD03	Ppp2r5a	GVIVESAYSDIVK	Liver (both lobes)|Lung
Q6PDF3	Svopl	TEFLPTK	Liver (both lobes)|Kidney
Q6PDI5	Ecpas	TEALSVVELLLK	Lung
Q6PDK2	Kmt2d	SQLDILSLLK	Skin|Spleen|Salivary Gland
Q6PDN3	Mylk	VSDVYDIEER	Kidney
Q6PFD9	Nup98	LADINYEGR	Testes
Q6PGC1	Dhx29	LTPLGQHLAALPVNVK	Brain
Q6PHN9	Rab35	DYDHLFK	Kidney
Q6PHZ2	Camk2d	FTDEYQLFEELGK	Liver (both lobes)|Brain
Q6PIP5	Nudcd1	LFVLTTK	Testes
Q6VH22	Ift172	SHYGYEVEEVK	Testes
Q6WVG3	Kctd12	DLQLVLPDYFPER	Brain|Kidney
Q6ZPJ3	Ube2o	SGYPDIGFPLFPLSK	Liver (both lobes)|Brain|Red Blood Cells|Testes|Lung
Q6ZQ38	Cand1	IGEYLEK	Liver (both lobes)|Brain|Red Blood Cells|Kidney|Testes
Q6ZQ73	Cand2	SGEVQNLAVK	Skeletal Muscle
Q6ZQI3	Mlec	FAEVYFAQSQQK	Liver (both lobes)
Q6ZWN5	Rps9	LFEGNALLR	Brain|Eye|Heart
Q6ZWV7	Rpl35	VLTVINQTQK	Kidney|Pancreas|Salivary Gland
Q6ZWX6	Eif2s1	VVTDTDETELAR	Liver (both lobes)|Skeletal Muscle|Spleen|Pancreas
Q70IV5	Synm	AALEALLGR	Lung
Q71KU9	Fgl1	IDLTDFEK	Plasma
Q71LX4	Tln2	NLATSLAELR	Brain|Kidney
Q78IK2	Atp5md	YFNSYTLTGR	Brain|Kidney
Q78IK4	Apool	DAYVYLK	Liver (both lobes)|Testes|Heart
Q78JT3	Haao	ELPFPLNTR	Kidney|Skin|Spleen|Salivary Gland
Q78PG9	Ccdc25	LSSAHVYLR	Plasma
Q78PY7	Snd1	SSHYDELLAAEAR	Brain|Epididymis
Q78ZA7	Nap1l4	EAATVEELNPK	Plasma|Liver (both lobes)|Brain|Red Blood Cells|Kidney|Eye|Lung|Heart
Q7TME0	Plppr4	ANADVEIITPR	Brain
Q7TMM9	Tubb2a	INVYYNEAAGNK	Brain|Kidney
Q7TNG5	Eml2	GDTLYVGTTR	Kidney|Salivary Gland
Q7TNV0	Dek	IHFFLSK	Plasma
Q7TPR4	Actn1	LAILGIHNEVSK	Plasma|Red Blood Cells
Q7TPZ8	Cpa1	FPNSEVEVK	Liver (both lobes)|Kidney
Q7TQ48	Srl	LIGIEVPHK	Skin|Heart|Skeletal Muscle
Q7TQ62	Podn	ELYLTGNR	Plasma
Q7TQI3	Otub1	LLTSGYLQR	Skin|Brown Adipose|Skeletal Muscle|Spleen|Salivary Gland
Q7TSV4	Pgm2	GVVISFDAR	Kidney|Pancreas|Salivary Gland
Q7TT50	Cdc42bpb	TSSLLILTENENEK	Liver (both lobes)|Lung
Q80SW1	Ahcyl1	VVLLAEGR	Kidney|Skeletal Muscle|Spleen|Pancreas
Q80T21	Adamtsl4	GGPLGYQK	Plasma
Q80TJ1	Cadps	HLQDLFAPLVVR	Brain
Q80UG5	Septin9	YLQEEVNINR	Kidney
Q80UU9	Pgrmc2	FYGPAGPYGIFAGR	Brain
Q80W65	Pcsk9	GTSLHSLR	Plasma
Q80WJ7	Mtdh	TELGLDLGLEPK	Liver (both lobes)|Lung
Q80WV7	Srrm3	AAEPGLVK	Testes
Q80X90	Flnb	VVASGPGLEHGK	Liver (both lobes)|Lung
Q80XD8	Prap1	ALEPLEK	Plasma
Q80XI3	Eif4g3	ELEAASAPEER	Testes
Q80XL6	Acad11	AVLTVTQYR	Liver (both lobes)
Q80XR2	Atp2c1	SLEELSK	Skin|Spleen|Salivary Gland
Q80YC5	F12	DAPDGPTVVLTVDGR	Plasma
Q80YN3	Bcas1	TLVSPNK	Liver (both lobes)
Q80YR5	Safb2	GEPVISVK	Testes
Q80YT5	Spata20	VTTALLAR	Testes
Q80YX1	Tnc	FTTDLDSPR	Plasma
Q810A7	Ddx42	DIPVLVATDVAAR	Brain|Skin|Lung|Spleen|Salivary Gland
Q8BFR5	Tufm	ELLTEFGYK	Kidney|Pancreas|Salivary Gland
Q8BFW7	Lpp	PTFNVQVK	Testes|Lung
Q8BG05	Hnrnpa3	EDSVKPGAHLTVK	Testes|Eye|Heart
Q8BG32	Psmd11	YQEALHLGSQLLR	Liver (both lobes)|Brain|Lung
Q8BGC0	Htatsf1	LLDEDEIR	Liver (both lobes)|Brain
Q8BGD9	Eif4b	SILPTAPR	Plasma
Q8BGH2	Samm50	DVVVQHVHFDGLGR	Liver (both lobes)
Q8BGQ7	Aars	DIINEEEVQFLK	Kidney|Pancreas|Salivary Gland
Q8BH06	Il17re	LVGALAELLR	Seminal Vesicles
Q8BH35	C8b	GGTSEDITALAYK	Plasma|White Adipose|Brown Adipose
Q8BH43	Wasf2	EEEVSLQGINTR	Lung
Q8BH59	Slc25a12	IAPLAEGALPYNLAELQR	Skeletal Muscle
Q8BH60	Gopc	EHGVPILISEIHPGQPADR	Plasma
Q8BH61	F13a1	FQEGQEEER	Plasma|Skin|Lung|White Adipose|Brown Adipose
Q8BHC1	Rab39b	DIYELVK	Liver (both lobes)
Q8BHG2	Czib	ENSIDILSSTIK	Kidney|Pancreas
Q8BJW6	Eif2a	YQAVPSEVPSEEPK	Skeletal Muscle
Q8BK64	Ahsa1	ETFLTSPEELYR	Liver (both lobes)|Brain|Testes|Lung
Q8BK67	Rcc2	DGQILPVPNVVVR	Liver (both lobes)|Brain|Kidney
Q8BKX1	Baiap2	EGDLITLLVPEAR	Brain
Q8BL66	Eea1	IQNLEALLQK	Spleen|Pancreas
Q8BLF1	Nceh1	VTDTDFDGVEVR	Liver (both lobes)|Skeletal Muscle|Spleen|Pancreas
Q8BMA6	Srp68	DLPDVQELITQVR	Liver (both lobes)
Q8BMF4	Dlat	DIDSFVPSK	Liver (both lobes)|Testes|Heart
Q8BMJ2	Lars	STGNFLTLSQAVDK	Kidney|Pancreas
Q8BMK4	Ckap4	IETNENNLESAK	Kidney|Pancreas|Salivary Gland
Q8BMP6	Acbd3	NANKPLLDEIVPVYR	Brain
Q8BMS1	Hadha	DGPGFYTTR	Skin|Brown Adipose|Spleen|Salivary Gland
Q8BND5	Qsox1	EFNIAGFPTVR	Plasma|Epididymis|Seminal Vesicles
Q8BP40	Acp6	APNGQRPVDR	Testes
Q8BP67	Rpl24	VFQFLNAK	Brain|Skeletal Muscle
Q8BPB5	Efemp1	SGNENGEFYLR	Plasma
Q8BQ47	Cnpy4	EVLELGQVLDTGK	Skin|Heart|Spleen|Salivary Gland
Q8BRN9	Cc2d1b	AGQPIDLSK	Skin|Brown Adipose|Spleen|Salivary Gland
Q8BSM7	Slc43a1	LIGLALDHK	Red Blood Cells
Q8BSS9	Ppfia2	LELAEQK	Plasma
Q8BSY0	Asph	LVQLFPSDTTLK	Ovary|Spleen|Pancreas
Q8BTM8	Flna	IANLQTDLSDGLR	Spleen|Pancreas
Q8BTZ7	Gmppb	FVEKPQVFVSNK	Brain|Epididymis
Q8BU14	Sec62	VDYFIASK	Testes|Heart
Q8BVA4	Lmod1	ALLQNNTLTELR	Salivary Gland
Q8BVI4	Qdpr	EGGLLTLAGAK	Liver (both lobes)|Brain|Red Blood Cells|Kidney|Lung|Skeletal Muscle
Q8BWG8	Arrb1	VQYAPERPGPQPTAETTR	Brain
Q8BWM0	Ptges2	VDLYEAANK	Spleen|Pancreas
Q8BWT1	Acaa2	TNVSGGAIALGHPLGGSGSR	Liver (both lobes)|Brain|Red Blood Cells|Kidney|Testes|Lung
Q8BYI9	Tnr	VATHLSTPQGLQFK	Liver (both lobes)|Brain|Kidney
Q8BZH1	Tgm4	TIPHLTK	Liver (both lobes)|Lung
Q8C0M9	Asrgl1	DLSAGAVSAVR	Kidney|Pancreas|Salivary Gland
Q8C1B7	Septin11	ELEEEVSNFQK	Kidney|Pancreas
Q8C1Z7	Bbs4	SLFLLGK	Testes
Q8C255	Dpep2	LTLEQIDLIR	Plasma
Q8C5L6	Inpp5k	DQLFIAK	Testes|Ovary
Q8C633	Cabs1	TPTEADIFFGADNTIPK	Testes
Q8C7E7	Stbd1	EFVPVGK	Liver (both lobes)
Q8C8R3	Ank2	TAVPQGQETLSR	Brain
Q8CAY6	Acat2	ILVTLLHTLER	Liver (both lobes)|Brain
Q8CB27	Yod1	EALPVLTR	Red Blood Cells|Testes|Heart
Q8CBB9	Rsad2	INFSGGEPFLQDR	Heart
Q8CCJ3	Ufl1	ELQELSLSIK	Pancreas|Salivary Gland
Q8CCK0	H2afy2	GVTIASGGVLPR	Plasma|Red Blood Cells
Q8CDN6	Txnl1	IFINLPR	Brain|Red Blood Cells
Q8CFG0	Sulf2	SSILTGK	Kidney
Q8CFG8	C1sb	GDSGGAFAFQVPNVK	Lung
Q8CG14	C1sa	TTLLENAQR	Plasma
Q8CG47	Smc4	FTQLDLEDVQVR	Skin|Spleen|Salivary Gland
Q8CGC7	Eprs	VYEELLAIPVVR	Kidney|Spleen|Pancreas
Q8CGY6	Unc45b	HFQLQDYK	Skeletal Muscle
Q8CHP8	Pgp	GETAVPGAPETLR	Plasma|Liver (both lobes)|Brain|Red Blood Cells|Kidney|Testes|Skin
Q8CHT0	Aldh4a1	AIDAALAAR	Kidney|Pancreas|Salivary Gland
Q8CI43	Myl6b	EAFELFDR	Brain
Q8CI51	Pdlim5	ILAQITGTEHLTESENDNTK	Skeletal Muscle
Q8CI94	Pygb	LVTSIGDVVNHDPVVGDR	Kidney|Skin|Heart|Spleen|Salivary Gland
Q8CIB5	Fermt2	TSTILGDITSIPELADYIK	Liver (both lobes)|Brain|Red Blood Cells
Q8CIE6	Copa	LLHDQVGVIQFGPYK	Liver (both lobes)
Q8CIP4	Mark4	TALAPGNDR	Lung
Q8CIZ8	Vwf	LSSETFGFAAR	Red Blood Cells
Q8JZN5	Acad9	NLSEFGLIQEK	Brown Adipose|Spleen|Pancreas
Q8JZR0	Acsl5	EAILEDLQK	Liver (both lobes)
Q8JZU2	Slc25a1	GTYQGLTATVLK	Kidney|Pancreas|Salivary Gland
Q8JZZ0	Ugt3a2	LTEEITYGR	Kidney
Q8K009	Aldh1l2	ADPLALAAEK	Brain
Q8K010	Oplah	LLSEDPANYADAPTEGIR	Liver (both lobes)
Q8K023	Akr1c18	GIVALAK	Ovary
Q8K0D2	Habp2	DEIPHNDIALLK	Plasma
Q8K0E8	Fgb	AHYGGFTVQNEASK	Plasma|Red Blood Cells|Skin|Heart|White Adipose|Brown Adipose|Skeletal Muscle
Q8K0U4	Hspa12a	IIIPQDVGLTILK	Spleen|Pancreas
Q8K124	Plekho2	ALNEGINR	Lung
Q8K135	Kiaa0319l	ISEDTAILK	Plasma
Q8K182	C8a	HTNLGPLETK	Plasma|White Adipose
Q8K183	Pdxk	VLSIQSHVVR	Brain
Q8K1B8	Fermt3	VVLAGGVAPTLFR	Red Blood Cells|Lung
Q8K1M6	Dnm1l	VPVGDQPK	Liver (both lobes)|Brain
Q8K2C9	Hacd3	EGSPETLTNLK	Liver (both lobes)
Q8K2I4	Manba	GSPGLSFYFK	Seminal Vesicles
Q8K310	Matr3	FDSEYER	Skin|Lung|Spleen|Salivary Gland
Q8K354	Cbr3	TNFFATR	Brain|Lung
Q8K370	Acad10	GGLVISPEGLSPAVR	Liver (both lobes)
Q8K3G9	Appl2	EIIEVQK	Pancreas
Q8K3H0	Appl1	YEVTEDVYTSR	Liver (both lobes)
Q8K3K8	Optn	ADLLGIVSELQLK	Liver (both lobes)|Brain
Q8K400	Stxbp5	LLQPVIVSPSGTILR	Brain|Lung
Q8K411	Pitrm1	EQAQQIELK	Kidney|Pancreas|Salivary Gland
Q8K441	Abca6	ELSVHVR	Lung
Q8K4B0	Mta1	YQADITDLLK	Lung
Q8K4P0	Wdr33	TIDYNPSVIK	Lung
Q8K4Z3	Naxe	YHYLGGR	Skin|Epididymis|Spleen|Salivary Gland
Q8K558	Treml1	SSDSGLPSDIPHVR	Lung
Q8QZR3	Ces2a	ETLPAVLK	Liver (both lobes)
Q8QZR4	Oaf	GVDSSVFEALPK	Plasma
Q8QZT1	Acat1	LNVKPLAR	Liver (both lobes)|Brain|Kidney|Testes|Lung|Epididymis|Seminal Vesicles|Spleen|Pancreas
Q8QZY1	Eif3l	IQLLVFK	Liver (both lobes)|Eye|Heart|Skeletal Muscle|Spleen|Pancreas
Q8QZY2	Glyctk	FYGLLAR	Kidney
Q8R010	Aimp2	FLFSLFGQK	Skeletal Muscle
Q8R016	Blmh	VSALIQK	Plasma|Liver (both lobes)|Red Blood Cells|Skin|Heart
Q8R081	Hnrnpl	FSTPEQAAK	Liver (both lobes)|Skin|Spleen|Salivary Gland
Q8R0P4	Aamdc	VLQTEQAVK	Kidney|Pancreas|Salivary Gland
Q8R0Y6	Aldh1l1	ANATEFGLASGVFTR	Liver (both lobes)|Brain|Lung
Q8R121	Serpina10	LFDEINPETK	Plasma
Q8R146	Apeh	SFNLSALEK	Liver (both lobes)|Brain
Q8R191	Syngr3	AGAAFDPVSFAR	Brain
Q8R1M8|Q8BHC1	Mptx1|Rab39b	AFTDLTR	Liver (both lobes)
Q8R1S0	Coq6	VALIGDAAHR	Liver (both lobes)|Heart
Q8R1U2	Cgref1	ASLEPEQEAGHQTEGK	Plasma
Q8R242	Ctbs	NIIDPTFR	Plasma|Testes|Seminal Vesicles
Q8R2Z0	C1qtnf12	FSGLPDTLLPQEPSQR	Plasma
Q8R3K3	Ptcd2	DSPALIAR	Liver (both lobes)|Skin|Spleen|Salivary Gland
Q8R3Q6	Ccdc58	IVHELNTTVPTASFAGK	Skin|Epididymis|Seminal Vesicles|Skeletal Muscle|Spleen|Salivary Gland
Q8R429	Atp2a1	EFDDLPLAEQR	Eye|Heart|Skeletal Muscle
Q8R4K8	Pappa	AYLDVNELK	Plasma
Q8VC12	Uroc1	LLALEFAQELR	Liver (both lobes)
Q8VC30	Tkfc	LIDAETTAK	Skin|Epididymis|Spleen|Salivary Gland
Q8VC66	Ssx2ip	ILLNDYEYR	Testes
Q8VCC2	Ces1	FGTVDFLGDPR	Lung
Q8VCG4	C8g	FLFQVSR	Plasma
Q8VCI0	Plbd1	LGLDYSYDLAPR	Testes
Q8VCI5	Pex19	DVLYPSLK	Liver (both lobes)|Skeletal Muscle
Q8VCM7	Fgg	YLQEIYNSNNQK	Plasma|Red Blood Cells|Lung|Heart|Skeletal Muscle
Q8VCN5	Cth	AVAALDGAK	Liver (both lobes)
Q8VCS0	Pglyrp2	VFTLLDPQASR	Plasma
Q8VCT4	Ces1d	SFSTVPYIVGINK	Plasma|Liver (both lobes)|Brain|Kidney|Epididymis|Seminal Vesicles
Q8VCW8	Acsf2	AASGLLSIGLR	Spleen|Pancreas
Q8VDD5	Myh9	TELEDTLDSTAAQQELR	Red Blood Cells|Kidney|Lung
Q8VDG7	Pafah2	ILQDASAGK	Kidney
Q8VDK1	Nit1	FPELSLK	Plasma|Liver (both lobes)|Brain|Kidney
Q8VDM4	Psmd2	VGQAVDVVGQAGKPK	Liver (both lobes)|Brain|Red Blood Cells|Kidney|Spleen|Pancreas
Q8VDN2	Atp1a1	AVFQANQENLPILK	Liver (both lobes)|Brain|Red Blood Cells|Kidney|Lung|Spleen|Pancreas
Q8VDQ1	Ptgr2	TGNVAEQLR	Liver (both lobes)
Q8VDQ8	Sirt2	IFSEATPR	Brain
Q8VE95	NA	LLPLAANGR	Liver (both lobes)|Lung
Q8VEE1	Lmcd1	SEALGVGEVALPGQGGLPK	Brain|Kidney
Q8VEE4	Rpa1	SAEDVGLK	Skin|Ovary|Brown Adipose|Spleen|Salivary Gland
Q8VEK3	Hnrnpu	DIDIHEVR	Liver (both lobes)|Brain
Q8VEM8	Slc25a3	GIFNGFSITLK	Kidney
Q8VHD8	Hrnr	ELLVTEFHQILK	White Adipose
Q8VHH5	Agap3	VGIVGNLSSGK	Brain|Lung
Q8VHL5	Crygn	ITLYEGK	Eye|Heart
Q8VI63	Mob2	ELVVLPR	Ovary
Q8VI75	Ipo4	ELLLPDTER	Liver (both lobes)|Brain|Kidney
Q8VIJ6	Sfpq	ISDSEGFK	Kidney|Pancreas|Salivary Gland
Q91V41	Rab14	TGENVEDAFLEAAK	Liver (both lobes)|Brain|Skin|Lung|Spleen|Salivary Gland
Q91V64	Isoc1	GLGSTVQEIDLTGVK	Kidney|Salivary Gland
Q91V80	Apof	LIQYYYDEK	Lung
Q91V98	Cd248	ELGGNLATPR	Plasma
Q91VA0	Acsm1	GDDVINASGYR	Liver (both lobes)|Kidney
Q91VC3	Eif4a3	DELTLEGIK	Skin|Spleen|Salivary Gland
Q91VD9	Ndufs1	FASEIAGVDDLGTTGR	Kidney|Skeletal Muscle|Spleen|Pancreas
Q91VH6	Memo1	SIEHLDK	Ovary|Brown Adipose
Q91VI7	Rnh1	ALSQPDTVLR	Brain|Skin|Lung
Q91VR2	Atp5f1c	VYGTGSLALYEK	Liver (both lobes)|Brain|Testes|Eye|Lung|Heart|Epididymis|Seminal Vesicles
Q91VW3	Sh3bgrl3	VYSTSVTGSR	Skin|Lung
Q91W90	Txndc5	GYPTLLLFR	Brain|Epididymis|Seminal Vesicles
Q91WD5	Ndufs2	VLFGEITR	Kidney|Pancreas|Salivary Gland
Q91WG8	Gne	EVGAFGTPVINLGTR	Brain|Kidney
Q91WJ8	Fubp1	IGGNEGIDVPIPR	Liver (both lobes)|Brain
Q91WP0	Masp2	WPEPVFGR	Plasma
Q91WP6	Serpina3n	AVLDVAETGTEAAAATGVK	Plasma|White Adipose
Q91WQ3	Yars	SEFVILR	Kidney|Pancreas|Salivary Gland
Q91WV7	Slc3a1	GEGLVLEHSTK	Kidney
Q91X17	Umod	VLNLGPITR	Plasma|Ovary
Q91X52	Dcxr	AAGAQVVAVSR	Liver (both lobes)|Lung
Q91X72	Hpx	GPDSVFLIK	Plasma|Liver (both lobes)|Brain|Red Blood Cells|Kidney|Testes|Skin|Heart
Q91X83	Mat1a	YLDEDTVYHLQPSGR	Liver (both lobes)
Q91XA2	Golm1	IQSSHSFQLENVNK	Lung
Q91XD4	Ftcd	LGLDSLAPFDPK	Liver (both lobes)
Q91XE0	Glyat	LFPSLLDTK	Liver (both lobes)
Q91XE4	Acy3	ELNQLLGPK	Brain|Kidney|Heart
Q91XV3	Basp1	ETPAASEAPSSAAK	Brain|Skin|Eye|Lung|Heart
Q91Y47	F11	TSESGLPSTR	Lung
Q91Y86	Mapk8	NIIGLLNVFTPQK	Liver (both lobes)
Q91Y97	Aldob	ALQASALAAWGGK	Plasma
Q91YH5	Atl3	EQLQALIPYVLNPSK	Liver (both lobes)
Q91YI0	Asl	DVLFPGYTHLQR	Liver (both lobes)|Brain|Red Blood Cells|Skin|Lung|Epididymis|Seminal Vesicles|Spleen|Salivary Gland
Q91YQ1	Rab29	YSQDSFSK	Liver (both lobes)
Q91YQ5	Rpn1	VTAEVVLVHPGGGSTSR	Brain|Testes|Skin|Lung|Epididymis|Seminal Vesicles|Spleen|Salivary Gland
Q91YR1	Twf1	HQTLQGVAFPISR	Brain
Q91YR9	Ptgr1	SLEEALR	Skin|Lung|Epididymis|Seminal Vesicles|Spleen|Salivary Gland
Q91YT0	Ndufv1	EAYEAGLIGK	Kidney|Pancreas|Salivary Gland
Q91Z53	Grhpr	LPEAIEEVK	Liver (both lobes)|Kidney|Lung|Epididymis|Seminal Vesicles|Spleen|Pancreas
Q91ZA3	Pcca	LSQYQEPIHLPGVR	Kidney
Q91ZV0	Mia2	DLEEELER	Ovary
Q91ZX7	Lrp1	TNTQPFDLQVYHPSR	Plasma|Liver (both lobes)|Brain|Red Blood Cells|Kidney|Skin|Spleen|Salivary Gland
Q920E5	Fdps	GLTVVQAFQELVEPK	Liver (both lobes)|Brain
Q921F2	Tardbp	FTEYETQVK	Brain|Heart
Q921F4	Hnrnpll	ITRPGNTDDPSGGNK	Brown Adipose
Q921F4	Hnrnpll	VSVSPVVHVR	Brown Adipose
Q921G7	Etfdh	TTGLHVTEYEDNLK	Kidney|Spleen|Pancreas
Q921H8|Q8VCH0	Acaa1a|Acaa1b	AEELGLPILGVLR	Kidney|Pancreas|Salivary Gland
Q921I1	Tf	HQTVLDNTEGK	Plasma|Red Blood Cells|Epididymis|Skeletal Muscle
Q921I1	Tf	IPSHAVVAR	Red Blood Cells|Testes|Skin|Eye|Heart
Q921M7	Fam49b	DAEGILEDLQSYR	Brain|Skin|Eye|Heart|Spleen|Salivary Gland
Q921X9	Pdia5	LLSTVAQAVK	Liver (both lobes)
Q922B2	Dars	GEEILSGAQR	Kidney|Pancreas|Salivary Gland
Q922D8	Mthfd1	TDPTTLTDDEINR	Kidney|Pancreas|Salivary Gland
Q922D8	Mthfd1	TDTDAELDLVSR	Kidney|Pancreas|Salivary Gland
Q922E4	Pcyt2	TQGVSTTDLVGR	Testes|Heart
Q922H4	Gmppa	YLQEFAPLGTGGGLYHFR	Lung
Q922R8	Pdia6	GSTAPVGGGSFPTITPR	Brain|Skin|Lung|Spleen|Salivary Gland
Q922U2	Krt5	YEELQQTAGR	Plasma
Q923D2	Blvrb	LQDVTDDHIR	Plasma|Liver (both lobes)|Red Blood Cells|Skin|Lung|White Adipose|Brown Adipose
Q923D4	Sf3b5	WEWLVNQHR	Plasma|Testes
Q923X1	Adgrl4	ITFTLSHVK	Lung
Q924A2	Cic	VLSEVDFEER	Brain
Q925I1	Atad3	ISVLEALR	Skeletal Muscle
Q93092	Taldo1	LAPALSVK	Plasma|Liver (both lobes)|Brain|Red Blood Cells|Kidney|Testes|Skin|Eye|Heart|White Adipose|Brown Adipose
Q99020	Hnrnpab	GFVFITFK	Liver (both lobes)|Brain|Lung|Epididymis|Seminal Vesicles|Skeletal Muscle
Q99J45	Nrbp1	ELLFHPALFEVPSLK	Skin|Ovary|Spleen|Salivary Gland
Q99JF8	Psip1	DFKPGDLIFAK	Testes|Eye
Q99JI4	Psmd6	GAEILEVLHSLPAVR	Liver (both lobes)|Brain|Red Blood Cells|Kidney|Skin|Lung|Spleen|Salivary Gland
Q99JY0	Hadhb	AALSGLLHR	Liver (both lobes)
Q99JY9	Actr3	LSEELSGGR	Epididymis
Q99JY9	Actr3	EFSIDVGYER	Testes
Q99K51	Pls3	VYALPEDLVEVKPK	Brain|Heart
Q99K82	Smox	ISLYSK	Plasma
Q99KB8	Hagh	HVEPGNAAIQEK	Liver (both lobes)|Brain|Red Blood Cells|Kidney|Testes|Lung
Q99KC8	Vwa5a	IVAELQDK	Liver (both lobes)|Lung
Q99KF1	Tmed9	QLVEQVEQIQK	Kidney|Pancreas|Salivary Gland
Q99KI0	Aco2	IVYGHLDDPANQEIER	Ovary|Epididymis|Seminal Vesicles
Q99KJ8	Dctn2	LLHEVQELTTEVEK	Liver (both lobes)|Brain|Lung
Q99KK2	Cmas	EVTEPLNLNPAK	Brain|Kidney
Q99KQ4	Nampt	AVPEGSVIPR	Skin|Lung|Spleen|Salivary Gland
Q99KR8	Fuca2	YNPGYLLPHK	Testes
Q99KY4	Gak	GQLVEFLK	Brain
Q99L04	Dhrs1	AGATVYITGR	Brain
Q99L45	Eif2s2	DYTYEELLNR	Liver (both lobes)|Brain|Skin|Lung|Spleen|Salivary Gland
Q99L47	St13	AIEINPDSAQPYK	Liver (both lobes)
Q99LB2	Dhrs4	VALVTASTDGIGFAIAR	Seminal Vesicles
Q99LC5	Etfa	AAAPGQLR	Liver (both lobes)|Brown Adipose|Epididymis
Q99LD4	Gps1	DSQTQAILTK	Brain|Skeletal Muscle
Q99LD8|Q9CWS0	Ddah2|Ddah1	EFFVGLSK	Kidney|Salivary Gland
Q99LF4	Rtcb	QIGNVAALPGIVHR	Liver (both lobes)|Brain|Testes|Lung|Seminal Vesicles
Q99LI8	Hgs	VEGHVFPEFK	Liver (both lobes)|Testes|Seminal Vesicles
Q99LJ1	Fuca1	DGLIVPIFQER	Lung
Q99LM2	Cdk5rap3	VTEFLQQK	Lung
Q99LP6	Grpel1	DLLEVADILEK	Kidney|Pancreas|Salivary Gland
Q99LX0	Park7	VTVAGLAGK	Brain|Eye|Lung|Heart|Epididymis|Seminal Vesicles|Skeletal Muscle|Spleen|Pancreas
Q99MD6	Txnrd3	SSGLDITQK	Testes|Seminal Vesicles
Q99MD9	Nasp	EAQLYAAQAHLK	Liver (both lobes)|Testes|Skin|Ovary|Seminal Vesicles|Spleen|Salivary Gland
Q99MN1	Kars1	IAPELYHK	Liver (both lobes)|Brain|Epididymis
Q99MW1	Stk31	YIDYGNTEILNR	Testes
Q99MZ7	Pecr	LTAAVDELR	Lung
Q99N16	Cyp4f3	ALSDEDIR	Spleen|Pancreas
Q99N32	Klb	ALLDSLVLR	Liver (both lobes)
Q99N69	Lpxn	EELGSSPFFER	Skin|Spleen|Salivary Gland
Q99NB9	Sf3b1	THEDIEAQIR	Skin|Spleen|Salivary Gland
Q99PL5	Rrbp1	LLATEQEDAAVAK	Brain|Epididymis|Seminal Vesicles
Q99PT1	Arhgdia	VAVSADPNVPNVIVTR	Liver (both lobes)
Q99PU5	Acsbg1	ANVIVVDTQK	Liver (both lobes)|Brain|Kidney
Q9CPP6	Ndufa5	YTEQITNEK	Liver (both lobes)|Brain
Q9CPT4	Mydgf	SEEFEVTK	Kidney|Spleen|Pancreas
Q9CPU0	Glo1	VLGLTLLQK	Plasma|Liver (both lobes)|Brain|Red Blood Cells|Kidney|Skin|Eye|Lung|Heart|White Adipose|Brown Adipose
Q9CPV4	Glod4	LELQGIQGAVDHAAAFGR	Brain|Red Blood Cells|Skin|Eye|Lung|Heart|Epididymis|Seminal Vesicles|Skeletal Muscle
Q9CPW4	Arpc5	ALAAGGVGSIVR	Brain
Q9CPX6	Atg3	ALEVAEYLTPVLK	Brain|Skin|Spleen|Salivary Gland
Q9CPY7	Lap3	GVLFASGQNLAR	Plasma|Liver (both lobes)|Brain|Kidney|Skin|White Adipose|Brown Adipose
Q9CQ06	Mrpl24	DTSVEDALER	Brown Adipose
Q9CQ52	Cela3b	TYQVVLGEHER	Skin|Spleen|Salivary Gland
Q9CQ54	Ndufc2	FLPDEAR	Kidney|Pancreas|Salivary Gland
Q9CQ60	Pgls	LLSVPFEK	Plasma|Liver (both lobes)|Brain|Red Blood Cells|Kidney|Testes|Skin|White Adipose|Brown Adipose
Q9CQ65	Mtap	GTIVTIEGPR	Skeletal Muscle
Q9CQ92	Fis1	GLLQTEPQNNQAK	Liver (both lobes)|Lung
Q9CQA3	Sdhb	DDFTEER	Kidney|Pancreas|Salivary Gland
Q9CQC7	Ndufb4	VSHIEDPALIR	Liver (both lobes)|Lung
Q9CQC9	Sar1b	IDRPEAISEER	Skeletal Muscle
Q9CQD1	Rab5a	GVDLTEPAQPAR	Spleen|Pancreas
Q9CQE5	Rgs10	ASSQVNVEGQSR	Brain
Q9CQE8	RTRAF	NAEPLINLDVNNPDFK	Liver (both lobes)|Lung
Q9CQF9	Pcyox1	YQSHDYAFSSVEK	Plasma
Q9CQH3	Ndufb5	TLAILQIESEK	Kidney|Pancreas|Salivary Gland
Q9CQI3	Gmfb	FIVYSYK	Brain
Q9CQI6	Cotl1	EVVQNFAK	Plasma|Brain|Kidney|Testes|Eye|Lung|Heart
Q9CQJ6	Denr	LDADYPLR	Skin|Spleen|Salivary Gland
Q9CQM5	Txndc17	TIFAYFSGSK	Skin|Skeletal Muscle
Q9CQQ7	Atp5pb	IAQLEEVK	Kidney|Pancreas|Salivary Gland
Q9CQR4	Acot13	TLAFASVDLTNK	Epididymis|Seminal Vesicles|Skeletal Muscle|Spleen|Pancreas
Q9CQR6	Ppp6c	VTNEFVHINNLK	Spleen|Pancreas
Q9CQU3	Rer1	YIPFTHGK	Kidney|Pancreas|Salivary Gland
Q9CQV8	Ywhab	AVTEQGHELSNEER	Liver (both lobes)|Brain|Red Blood Cells|Testes|Skin|Lung|Ovary|Spleen|Salivary Gland
Q9CQW2	Arl8b	DLPNALDEK	Brain|Kidney
Q9CQZ5	Ndufa6	VVDLLVIK	Liver (both lobes)|Skeletal Muscle
Q9CR00	Psmd9	ADVDLYQVR	Plasma|Red Blood Cells
Q9CR09	Ufc1	VVSEIPVLK	Brain
Q9CR16	Ppid	VFFDVDIGGER	Liver (both lobes)|Brain|Lung|Skeletal Muscle
Q9CR35	Ctrb1	LQQAALPIVSEAK	Spleen|Pancreas
Q9CR51	Atp6v1g1	EEAQAEIEQYR	Brain|Kidney
Q9CR57	Rpl14	LVAIVDVIDQNR	Skeletal Muscle
Q9CR86	Carhsp1	LQAVEVVITHLAPGTK	Brain|Red Blood Cells|Eye
Q9CRB3	Urah	TSYTNLDGR	Liver (both lobes)
Q9CU62	Smc1a	VVQLHEYSEELEK	Liver (both lobes)|Testes|Lung
Q9CVB6	Arpc2	DNTINLIHTFR	Testes|Skin|Lung|Spleen|Salivary Gland
Q9CWJ9	Atic	HVSPAGAAVGVPLSEDEAR	Plasma|Brain|Red Blood Cells|Skin|Epididymis|Seminal Vesicles
Q9CWK8	Snx2	YLESLVQTQQQLIK	Liver (both lobes)|Brain
Q9CWL8	Ctnnbl1	FVDILGLR	Skin|Spleen|Salivary Gland
Q9CWM4	Pfdn1	LADIQIEQLNR	Lung
Q9CWQ3	Atp23	TLDTNPYVK	Lung
Q9CWS0	Ddah1	TPEEYPESAK	Plasma|Brain|Testes|Lung
Q9CWS1	Rnf135	LVTFSISQK	Liver (both lobes)
Q9CWZ7	Napg	LGLSLVVPGGGIK	Testes
Q9CX00	Ist1	YLIEIAK	Red Blood Cells|Lung
Q9CX34	Sugt1	LFQQIYSDGSDEVK	Skeletal Muscle|Spleen|Pancreas
Q9CX80	Cygb	SEELSEAER	Liver (both lobes)
Q9CXE7	Tmed5	TLVFEQR	Skin|Spleen|Salivary Gland
Q9CXW4	Rpl11	YDGIILPGK	Liver (both lobes)
Q9CXY6	Ilf2	ILPTLEAVAALGNK	Skin|Eye|Heart|Epididymis|Seminal Vesicles|Spleen|Salivary Gland
Q9CXZ1	Ndufs4	DTQLITVDEK	Kidney|Pancreas|Salivary Gland
Q9CY02	Ahsp	DLISTGIK	Plasma
Q9CY27	Tecr	VEPQATISEIK	Testes
Q9CY50	Ssr1	GEDFPANNIVK	Plasma
Q9CY64	Blvra	SLEDALR	Red Blood Cells|Skin|Spleen|Salivary Gland
Q9CYH2	Prxl2a	AALEYLEDIDLK	Brain
Q9CYR6	Pgm3	IATLISSFLK	Lung|Epididymis|Seminal Vesicles
Q9CZ04	Cops7a	VTGQNQEQFLLLAK	Brain
Q9CZ13	Uqcrc1	NNGAGYFLEHLAFK	Kidney|Pancreas
Q9CZ30	Ola1	EIEVLNK	Red Blood Cells|Kidney|Skin|Heart|Epididymis|Seminal Vesicles|Spleen|Salivary Gland
Q9CZ44	Nsfl1c	TGFSLDNGDLR	Brain|Red Blood Cells|Skin|Lung
Q9CZD3	Gars1	TFFSFPAVVAPFK	Liver (both lobes)|Brain|Lung|Epididymis|Seminal Vesicles
Q9CZM2	Rpl15	FHHTIGGSR	Brain|Skin
Q9CZT5	Vasn	ENHVVLASPEETR	Plasma
Q9CZU6	Cs	DVLSNLIPK	Epididymis|Seminal Vesicles
Q9CZU6	Cs	EGSSIGAIDSR	Kidney|Pancreas|Salivary Gland
Q9CZW5	Tomm70	NVDLSTFYQNR	Skin|Ovary|Brown Adipose|Spleen|Salivary Gland
Q9CZX8	Rps19	DVNQQEFVR	Skin|Spleen|Salivary Gland
Q9D020	Nt5c3a	SHGLLIEQGIPK	Spleen|Pancreas
Q9D051	Pdhb	DIIFAVK	Kidney|Pancreas|Salivary Gland
Q9D0E1	Hnrnpm	AFITNIPFDVK	Lung
Q9D0K2	Oxct1	DEADADLINAGK	Kidney|Pancreas|Salivary Gland
Q9D0M3	Cyc1	GLLSSLDHTSIR	Kidney|Pancreas|Salivary Gland
Q9D0M5	Dynll2	DIAAYIK	Brain
Q9D0T1	Snu13	NVPYVFVR	Brown Adipose
Q9D154	Serpinb1a	TYNFLPEYLASTQK	Liver (both lobes)|Brain
Q9D172	Gatd3a	GVEVTVGHEQEEGGK	Kidney|Pancreas|Salivary Gland
Q9D1A2	Cndp2	TVFGVEPDLTR	Skin|Ovary|Epididymis|Seminal Vesicles|Skeletal Muscle|Spleen|Salivary Gland
Q9D1C8	Vps28	EDRPITIK	Liver (both lobes)
Q9D1E6	Tbcb	SLTIAEFK	Kidney|Pancreas|Salivary Gland
Q9D1G1	Rab1b	EFADSLGVPFLETSAK	Liver (both lobes)|Skin|Lung|Skeletal Muscle|Spleen|Salivary Gland
Q9D1H6	Ndufaf4	DVNSLLK	Kidney|Heart
Q9D1H9	Mfap4	GFYYSLK	Plasma
Q9D1J3	Sarnp	FGISSVPTK	Epididymis|Seminal Vesicles|Skeletal Muscle|Spleen|Pancreas
Q9D1K2	Atp6v1f	DTTINEIEDTFR	Brain
Q9D1M0	Sec13	NGGQILIADLR	Liver (both lobes)
Q9D1M4	Eef1e1	DLNSYLEDK	Lung
Q9D1Q6	Erp44	NIIGYFEQK	Lung
Q9D1U0	Grifin	VLQFPHR	Eye|Heart
Q9D1X0	Nol3	GVLTGPEYEALDALPDAER	Lung
Q9D2G2	Dlst	EAVTFLR	Kidney|Pancreas|Salivary Gland
Q9D2V7	Coro7	SLQSLLGPSSK	Brain
Q9D358	Acp1	IELLGSYDPQK	Plasma|Liver (both lobes)|Brain|Red Blood Cells|Kidney|Testes|Lung
Q9D379	Ephx1	NIYSLTPLLGQR	Liver (both lobes)
Q9D3A9	Ttyh1	ALASIHSQLQGLER	Brain
Q9D3D9	Atp5f1d	AQSELSGAADEAAR	Liver (both lobes)|Brain|Skeletal Muscle
Q9D3E6	Stag1	NLLAAFSK	Ovary
Q9D404	Oxsm	VSPFFVPK	Kidney|Salivary Gland
Q9D4H2	Gcc1	TQLATLTSSLATVTQEK	Liver (both lobes)
Q9D5V6	Syap1	ITESVTETAQTIK	Kidney|Salivary Gland
Q9D5Y1	Ccdc39	LDFETLK	Testes
Q9D666	Sun1	LAELTVLLQK	Ovary|Seminal Vesicles
Q9D6J6	Ndufv2	DIEEIIDELK	Kidney|Pancreas|Salivary Gland
Q9D6R2	Idh3a	IAEFAFEYAR	Brain|Testes
Q9D6Y9	Gbe1	LEAALADVPELAR	Eye|Heart|Skeletal Muscle
Q9D7G0	Prps1	LNVDFALIHK	Red Blood Cells|Heart|Skeletal Muscle
Q9D7H3	RtcA	AFVAGVLPLK	Testes
Q9D7Q1	Chit1	GLVDAGYEVDK	Plasma
Q9D7X3	Dusp3	LGITHVLNAAEGR	Brain|Lung|Skeletal Muscle
Q9D7X8	Ggct	SNISSLDEQEGVK	Kidney|Pancreas|Salivary Gland
Q9D819	Ppa1	DISDVER	Plasma|Brain|Kidney|Testes
Q9D855	Uqcrb	DDTLHETEDVK	Kidney|Salivary Gland
Q9D892	Itpa	IDLPEYQGEPDEISIQK	Liver (both lobes)|Brain|Red Blood Cells|Kidney
Q9D898	Arpc5l	ALAVGGLGSIIR	Liver (both lobes)|Brain|Kidney
Q9D8E6	Rpl4	NIPGITLLNVSK	Liver (both lobes)|Brain|Testes|Lung
Q9D8N0	Eef1g	TFLVGER	Brain|Skin|Lung|Epididymis|Seminal Vesicles
Q9D8S3	Arfgap3	EESIVSSLR	Brain|Epididymis|Seminal Vesicles
Q9D8S9	Bola1	NESGGHAVPAGSETHFR	Skeletal Muscle
Q9D8T2	Gsdmdc1	ALETTVLSK	Skin|Spleen|Salivary Gland
Q9D8U8	Snx5	ALIDYENSNK	Kidney
Q9D8W5	Psmd12	IYVEIER	Liver (both lobes)|Brain|Red Blood Cells
Q9D8Y0	Efhd2	LSEIDVSTEGVK	Plasma|Brain|Kidney|Testes
Q9D9T8	Efhc1	YVTPSDFDQLK	Testes
Q9D9V3	Echdc1	VIELENWTEGK	White Adipose|Brown Adipose
Q9D9Z5	Dda1	EYPSEQIIVTEK	Brain|Kidney
Q9DAK9	Phpt1	VSGELQR	Brain|Skin|Eye|Heart
Q9DAN1	Pdilt	ETELQQEFDITHAPELK	Testes
Q9DAR7	Dcps	DLTPEHLPLLR	Brain
Q9DB07	Ift46	YTPQLIDLDHK	Testes
Q9DB15	Mrpl12	LVESLPQEIK	Liver (both lobes)|Kidney|Skin|Heart|Epididymis|Seminal Vesicles|Spleen|Salivary Gland
Q9DB29	Iah1	GFSGYNTR	Brain
Q9DB50	Ap1s2	ELVQTVLAR	Skin|Ovary|Spleen|Salivary Gland
Q9DBB9	Cpn2	VVFLNTQVR	Plasma
Q9DBD0	Ica	ILFNQQELFGR	Plasma|Skin|Heart|White Adipose
Q9DBE0	Csad	FYDVALDTGDK	Liver (both lobes)|Kidney
Q9DBG1	Cyp27a1	LYPVVPTNSR	Kidney
Q9DBG3	Ap2b1	DIPNENELQFQIK	Liver (both lobes)|Brain|Kidney|Testes|Lung
Q9DBG5	Plin3	LEPQIATASEYAHR	Plasma|Skin|White Adipose|Brown Adipose|Spleen|Salivary Gland
Q9DBG6	Rpn2	TGQEVVFVAEPDNK	Liver (both lobes)|Brain
Q9DBK0	Acot12	IGQIITIR	Liver (both lobes)
Q9DBL7	Coasy	DGLSEAAAQSR	Liver (both lobes)
Q9DBM2	Ehhadh	GTQLLPR	Liver (both lobes)
Q9DBP5	Cmpk1	SVDEVFGEVVK	Plasma|Liver (both lobes)|Brain|Red Blood Cells|Testes|Skin|White Adipose|Brown Adipose
Q9DC11	Plxdc2	IYGPADSASR	Plasma
Q9DC61	Pmpca	LYLNVLNR	Brain
Q9DC69	Ndufa9	YVVNHLGR	Kidney|Pancreas|Salivary Gland
Q9DCC4	Pycr3	IAAQTLLGTAK	Brain
Q9DCD0	Pgd	AGQAVDDFIEK	Skeletal Muscle
Q9DCS9	Ndufb10	ELEQFTK	Brain
Q9DCT8	Crip2	TVYFAEK	Plasma|Lung|Heart
Q9DCV4	Rmdn1	AIELNPK	Heart
Q9DCW4	Etfb	AGDLGVDLTSK	Plasma|Liver (both lobes)|Brain|Kidney|Testes|Skin|Lung
Q9DCX2	Atp5pd	AIGNALK	Plasma|Liver (both lobes)|Heart
Q9DD06	Rarres2	SLQVALEEFHK	Plasma|White Adipose
Q9EP71	Rai14	LLQAVENGDAEK	Liver (both lobes)|Testes|Lung
Q9EPB4	Pycard	TGHFVDQHR	Lung
Q9EPB5	Serhl	ALQGYYDVR	Brown Adipose
Q9EPC1	Parva	DLAEDLYDGQVLQK	Brain|Kidney|Testes
Q9EPL8	Ipo7	ENIVEAIIHSPELIR	Brain|Kidney|Skeletal Muscle|Spleen|Pancreas
Q9EPL9	Acox3	TIFSTLENDPLFAR	Testes
Q9EPQ7	Stard5	DFVDLVLVK	Kidney|Skin|Ovary|Brown Adipose|Spleen|Salivary Gland
Q9EPX2	Papln	VALPAPAAQSR	Plasma|Red Blood Cells
Q9EQ06	Hsd17b11	SVAGEIVLITGAGHGIGR	Lung|Seminal Vesicles
Q9EQ20	Aldh6a1	TLADAEGDVFR	Kidney|Pancreas|Salivary Gland
Q9EQF6	Dpysl5	VHAENGELVAEGAK	Brain|Testes
Q9EQH2	Erap1	GIVQYLQK	Plasma
Q9EQH3	Vps35	SDDPDQQYLILNTAR	Brain
Q9EQK5	Mvp	IEGEGSVLQAK	Liver (both lobes)|Kidney|Skin|Lung|Spleen|Salivary Gland
Q9EQP2	Ehd4	LFEAEAQDLFR	Brain|Lung|Skeletal Muscle
Q9EQW7	Kif13a	ELELNTK	Lung
Q9ERK4	Cse1l	LVLDAFALPLTNLFK	Skeletal Muscle
Q9ERS2	Ndufa13	VGESVFHTTR	Skin|Eye|Heart|Spleen|Salivary Gland
Q9ESB3	Hrg	FESEFPQISK	Plasma|Skin
Q9EST5	Anp32b	LAEELPSLTHLNLSGNNLK	Liver (both lobes)|Skeletal Muscle
Q9ET01	Pygl	VFADYEAYVK	Plasma
Q9ET22	Dpp7	DLTQLFGFAR	Kidney|Pancreas
Q9JHH6	Cpb2	YGFLLPER	Plasma
Q9JHI5	Ivd	TDLTAVPASR	Kidney|Eye|Heart
Q9JHJ0	Tmod3	FGYQFTQQGPR	Lung
Q9JHR7	Ide	EQLGYIVFSGPR	Epididymis|Seminal Vesicles
Q9JHR7	Ide	LHIEALLHGNITK	Testes
Q9JHU4	Dync1h1	VNFLPEIITLSK	Liver (both lobes)|Brain|Red Blood Cells|Lung
Q9JHU9	Isyna1	SVLVDFLIGSGLK	Liver (both lobes)|Brain|Seminal Vesicles
Q9JHW2	Nit2	AVDNQVYVATASPAR	Eye|Heart|Skeletal Muscle
Q9JHW2	Nit2	ADLYTVESK	Kidney|Ovary|Brown Adipose
Q9JI11	Stk4	LGEGSYGSVYK	Liver (both lobes)
Q9JI75	Nqo2	ALTSDIFEEQR	Kidney|Salivary Gland
Q9JIF0	Prmt1	ATLYVTAIEDR	Kidney
Q9JIF7	Copb1	EAGELKPEEEITVGPVQK	Brain|Red Blood Cells|Kidney
Q9JII6	Akr1a1	HALSAGYR	Liver (both lobes)|Brain|Red Blood Cells|Skin|Lung
Q9JIL4	Pdzk1	INGVFVDK	Red Blood Cells|Kidney
Q9JIX0	Eny2	ALVPDSVK	Skin|Spleen|Salivary Gland
Q9JIX8	Acin1	GLLVDRPSETK	Lung
Q9JJ28	Flii	LDFDGLPSGIGK	Pancreas
Q9JJL3	Slco1b2	SSITQIER	Ovary
Q9JJN5	Cpn1	EALIQFLEQVHQGIK	Plasma
Q9JJU8	Sh3bgrl	GDYDAFFEAR	Brain|Red Blood Cells|Lung|Ovary|White Adipose|Brown Adipose|Epididymis
Q9JJU9	Crybb3	GEQFVLEK	Eye|Heart
Q9JJV1	Cryba2	GYQYVLER	Eye|Heart
Q9JJW5	Myoz2	FNTTAVPK	Kidney
Q9JJZ2	Tuba8	IHFPLVTYAPIISAEK	Testes
Q9JK37	Myoz1	VELGIDLLAYGAK	Lung|Skeletal Muscle
Q9JK48	Sh3glb1	TELDAHLENLLSK	Brain
Q9JK53	Prelp	NQLEEVPSALPR	Heart|Skeletal Muscle|Spleen|Pancreas
Q9JKB3	Ybx3	GAEAANVTGPDGVPVEGSR	Liver (both lobes)|Ovary
Q9JKF1	Iqgap1	LAAVAAINAAIQK	Red Blood Cells|Skin
Q9JKF6	Nectin1	RPYFTVDEAEAR	Brain
Q9JKR6	Hyou1	LYQPEYQEVSTEEQR	Brain|Lung|White Adipose|Epididymis|Seminal Vesicles
Q9JKV1	Adrm1	GDVEAFAK	Testes|Seminal Vesicles
Q9JKX4	Aatf	ALLTTNQLPQPDVFPVFK	Brain|Lung
Q9JKX6	Nudt5	ELEEETGYK	Testes
Q9JL62	Gltp	TLQNILEVEK	Brain
Q9JLB4	Cubn	IFGNDNIVGTHGK	Liver (both lobes)
Q9JLI8	Sart3	NQLEIER	Skin|Spleen|Salivary Gland
Q9JLQ0	Cd2ap	ISTYGLPAGGIQPHPQTK	Skin|Spleen|Salivary Gland
Q9JLV5	Cul3	GLTEQEVETILDK	Brain|Red Blood Cells|Kidney|Testes|Skin|Spleen|Salivary Gland
Q9JM76	Arpc3	AYLQQLR	Brain
Q9JM99	Prg4	GFPNVVTSAITLPNIR	Plasma
Q9JMA1	Usp14	AQLFALTGVQPAR	Liver (both lobes)|Brain|Red Blood Cells|Lung|Skeletal Muscle
Q9JMD3	Stard10	ESVQVPDDQDFR	Liver (both lobes)|Red Blood Cells|Kidney|Testes|Skin|Seminal Vesicles|Spleen|Salivary Gland
Q9JMH6	Txnrd1	TIGLETVGVK	Kidney|Pancreas|Salivary Gland
Q9QUJ7	Acsl4	ALLGGNVR	Heart
Q9QUM9	Psma6	HITIFSPEGR	Plasma|Red Blood Cells|Skin|Heart
Q9QUR6	Prep	NILQLHDLTTGALLK	Lung|Epididymis|Seminal Vesicles|Skeletal Muscle
Q9QUR7	Pin1	GDLGPFSR	Plasma|Liver (both lobes)|Brain|Kidney|Testes
Q9QUT0	Rhag	FFSPLLANK	Red Blood Cells
Q9QVP9	Ptk2b	NLLDAVDQAK	Skin|Spleen|Salivary Gland
Q9QWK4	Cd5l	IYGPGAGR	Plasma|Ovary
Q9QWR8	Naga	INQDPLGIQGR	Kidney|Pancreas|Salivary Gland
Q9QXC1	Fetub	HVPLIQPVEK	Plasma|Testes|Skin|Seminal Vesicles
Q9QXC1	Fetub	NTAPTSSPSVTAPR	Ovary
Q9QXG4	Acss2	ELADESLEK	Kidney|Salivary Gland
Q9QXN5	Miox	IQYGSFSYK	Kidney
Q9QXT0	Cnpy2	INPDGSQSVVEVPYAR	Liver (both lobes)|Brain|Lung|Skeletal Muscle
Q9QXW9	Slc7a8	SLTLVSQK	Kidney|Pancreas
Q9QXX4	Slc25a13	YLNIFGESQPNPK	Liver (both lobes)
Q9QXY6	Ehd3	ELVNNLAEIYGR	Liver (both lobes)|Kidney|Lung
Q9QY76	Vapb	VEQVLSLEPQHELK	Skin|Skeletal Muscle|Spleen|Salivary Gland
Q9QYB8	Add2	VNILGEVVEK	Liver (both lobes)|Brain|Red Blood Cells|Kidney|Lung
Q9QYC0	Add1	SLVQGELVTASK	Brain|Red Blood Cells|Testes|Skin|Lung|Spleen|Salivary Gland
Q9QYG0	Ndrg2	LDPTQTSFLK	Ovary|Brown Adipose
Q9QYR6	Map1a	VVSNTIEPLTLFHK	Brain
Q9QYR9	Acot2	ADAGGELNLAR	Kidney|Skin|Spleen|Salivary Gland
Q9QZ88	Vps29	ESYDYLK	Kidney|Pancreas
Q9QZ88	Vps29	GDFDENLNYPEQK	Kidney|Pancreas
Q9QZB7	Actr10	TAVVIDLGEAFTK	Lung
Q9QZD8	Slc25a10	VHLQTQQEVK	Liver (both lobes)|Lung
Q9QZD9	Eif3i	SGEVLVNVK	Plasma|Liver (both lobes)|Brain|Testes|Lung
Q9QZE7	Tsnax	SFQQELDAR	Brain|Testes|Seminal Vesicles
Q9QZM0	Ubqln2	NQDLALSNLESIPGGYNALR	Brain
Q9R059	Fhl3	TLTQGGVTYR	Brain|Skeletal Muscle
Q9R062	Gyg1	GALVLGSSLK	Skeletal Muscle
Q9R069	Bcam	LASVEPQGSEFLGTVHSLGR	Brown Adipose
Q9R097	Spint1	YTSGFDELQNIHFLSDK	Plasma
Q9R098	Hgfac	TTDVTQTFGIEK	Plasma
Q9R0A0	Pex14	VQELAHELATAK	Liver (both lobes)
Q9R0B6	Lamc3	AYEITYVR	Testes
Q9R0G6	Comp	ELQETNAALQDVR	Plasma
Q9R0M4	Podxl	IIIETK	Skeletal Muscle|Spleen|Pancreas
Q9R0P3	Esd	VFEHSSVELK	Epididymis|Skeletal Muscle|Spleen|Pancreas
Q9R0P4	Smap	LVIGDHK	Testes
Q9R0P5	Dstn	HEYQANGPEDLNR	Brain|Testes|Eye|Heart|Seminal Vesicles
Q9R0Q6	Arpc1a	TLESSIQGLR	Brain
Q9R0Q7	Ptges3	DVNVNFEK	Kidney|Pancreas|Salivary Gland
Q9R0S3	Mmp17	YGLPYEDR	Plasma
Q9R0X4	Acot9	VHSEVSSLDSR	Kidney|Pancreas
Q9R0Y5	Ak1	YGYTHLSTGDLLR	Brain|Testes|Skin|Eye|Lung|Heart|Seminal Vesicles|Skeletal Muscle
Q9R111	Gda	NIEEVYVGGK	Brain|Red Blood Cells|Kidney|Skin|Heart|Spleen|Salivary Gland
Q9R182	Angptl3	GQINDIFQK	Lung
Q9R1P0	Psma4	VEIATLTR	Plasma|Liver (both lobes)|Brain|Red Blood Cells|Testes|Skin|Lung|White Adipose|Brown Adipose
Q9R1P1	Psmb3	FGPYYTEPVIAGLDPK	Liver (both lobes)|Brain|Red Blood Cells|Testes|Skin|Eye|Heart|Spleen|Salivary Gland
Q9R1P3	Psmb2	FILNLPTFSVR	Brain|Red Blood Cells|Eye|Heart
Q9R1P4	Psma1	THAVLVALK	Plasma|White Adipose
Q9R1P4	Psma1	ETLPAEQDLTTK	Liver (both lobes)|Brain|Red Blood Cells|Kidney|Testes|Skin|Eye|Lung|Heart|Ovary|White Adipose|Brown Adipose
Q9R1T2	Sae1	NLILAGVK	Kidney|Pancreas|Salivary Gland
Q9R257	Hebp1	EDVSYEER	Plasma
Q9R269	Ppl	DAALQNVSDSEK	Kidney|Pancreas
Q9WTI7	Myo1c	GEELLSPLNLEQAAYAR	Liver (both lobes)|Kidney|Lung
Q9WTL7	Lypla2	NFPQAANGSAK	Liver (both lobes)|Skeletal Muscle|Spleen|Pancreas
Q9WTP6	Ak2	NGFLLDGFPR	Liver (both lobes)|Brain|Kidney|Lung|Heart
Q9WTP7	Ak3	GVLETFSGTETNK	Kidney|Pancreas|Salivary Gland
Q9WTQ5	Akap12	GAVYVSEELSK	Brain|Skin|Lung|White Adipose|Brown Adipose
Q9WTR5	Cdh13	INENTGSVSVTR	Liver (both lobes)|Brain|Kidney|Heart
Q9WTX5	Skp1	NDFTEEEEAQVR	Epididymis
Q9WU19	Hao1	HGVDGILVSNHGAR	Liver (both lobes)
Q9WU78	Pdcd6ip	LLDEEEATDNDLR	Kidney|Pancreas|Salivary Gland
Q9WUA2	Farsb	LGVLHPDVITK	Liver (both lobes)|Brain|Epididymis|Seminal Vesicles
Q9WUA3	Pfkp	NLGFDTR	Kidney|Pancreas|Salivary Gland
Q9WUL7	Arl3	LNVWDIGGQR	Kidney|Pancreas
Q9WUM4	Coro1c	HVFGQAVK	Plasma
Q9WUM4	Coro1c	YFEITDESPYVHYLNTFSSK	Liver (both lobes)|Brain|Testes|Lung
Q9WUM5	Suclg1	LVGGTTPGK	Kidney|Pancreas|Salivary Gland
Q9WUT3	Rps6ka2	ATDAEYAVK	Ovary
Q9WUU7	Ctsz	VGDYGSLSGR	Plasma|Lung
Q9WUZ5	Tnni1	VEVVDEER	Testes
Q9WV32	Arpc1b	NSVSQISVLSGGK	Testes|Heart|Ovary|Seminal Vesicles
Q9WV54	Asah1	PLTVNLDFQR	Brain
Q9WV55	Vapa	AVPLNASK	Liver (both lobes)|Red Blood Cells|Testes|Heart|Seminal Vesicles
Q9WV60	Gsk3b	DIKPQNLLLDPDTAVLK	Brain|Lung
Q9WV92	Epb41l3	VLQETILVEER	Liver (both lobes)|Brain|Kidney|Testes
Q9WV98	Timm9	FQEYHIQQNEALAAK	Liver (both lobes)
Q9WVA4	Tagln2	EDVGQPQPGR	Brain|Red Blood Cells|Skin|Ovary|White Adipose|Skeletal Muscle|Spleen|Salivary Gland
Q9WVB0	Rbpms	FDPEIPQTLR	Kidney|Ovary|Brown Adipose
Q9WVC5	Trpc7	FLDSAEYGNIPVVR	Testes
Q9WVH9	Fbln5	YPGAYYIFQIK	Brain
Q9WVJ2	Psmd13	YYQTIGNHASYYK	Brain|Kidney|Skin|Spleen|Salivary Gland
Q9WVJ3	Cpq	LGLLVDTVGPR	Plasma
Q9WVK4	Ehd1	ELVNNLGEIYQK	Lung
Q9WVL0	Gstz1	VITSGFNALEK	Brown Adipose|Epididymis|Seminal Vesicles|Spleen|Pancreas
Q9WVL3	Slc12a7	DTTAAHQALLVAK	Kidney|Ovary
Q9Z0L8	Ggh	YIESAGAR	Plasma|Epididymis|Seminal Vesicles
Q9Z0M5	Lipa	LPDPLLK	Kidney
Q9Z0M6	Cd97	TLAQFLPK	Plasma
Q9Z0M9	Il18bp	ALVLEELSPTLR	Plasma|Brown Adipose
Q9Z0P4	Palm	GLAEDVTR	Kidney|Salivary Gland
Q9Z0S1	Bpnt1	IIQLIEGK	Kidney|Pancreas|Salivary Gland
Q9Z0T6	Pkdrej	GLPGVLR	Testes
Q9Z0Y1	Dctn3	VQVALGNIASK	Skin|Spleen|Salivary Gland
Q9Z126	Pf4	TISSGIHLK	Plasma
Q9Z130	Hnrnpdl	DLTEYLSR	Brain|Kidney
Q9Z160	Cog1	ALQLLYDLR	Brain
Q9Z1D1	Eif3g	ELAEQLGLSTGEK	Liver (both lobes)|Brain|Lung
Q9Z1G3	Atp6v1c1	GVTQIDNDLK	Liver (both lobes)|Skeletal Muscle|Spleen|Pancreas
Q9Z1G4	Atp6v0a1	HLGTLNFGGIR	Lung
Q9Z1L4	Rs1	VFYGNSDR	Liver (both lobes)|Kidney|Eye|Heart
Q9Z1N5	Ddx39b	VAVFFGGLSIK	Brain
Q9Z1Q5	Clic1	NSNPALNDNLEK	Liver (both lobes)|Brain|Red Blood Cells|Kidney|Testes|Skin|Eye|Lung|Heart
Q9Z1Q9	Vars	VPLEVQEADEAK	Liver (both lobes)|Brain|Epididymis
Q9Z1R2	Bag6	SFFHQHYLGGQEPTPSNIR	Testes
Q9Z1R3	Apom	ETGQGYQR	Plasma
Q9Z1S8	Gab2	ELQDSFVFDIK	Ovary
Q9Z1T2	Thbs4	AFSGLTQNPESIELR	Plasma
Q9Z1Z0	Uso1	ENFIEK	Lung
Q9Z2D1	Mtmr2	GTLTVTSYR	Liver (both lobes)|Brain|Kidney
Q9Z2I0	Letm1	DFSAFFQK	Liver (both lobes)|Skeletal Muscle
Q9Z2I8	Suclg2	LEGTNVQEAQNILK	Kidney|Pancreas|Salivary Gland
Q9Z2I9	Sucla2	EQAVTLAQK	Kidney|Pancreas|Salivary Gland
Q9Z2K1	Krt16	ASLENSLEETK	Plasma
Q9Z2M7	Pmm2	IGVVGGSDFEK	Liver (both lobes)|Red Blood Cells|Kidney|Skin|Epididymis|Seminal Vesicles|Spleen|Salivary Gland
Q9Z2R9	Eif2ak1	EIAFEAQTSR	Epididymis|Seminal Vesicles
Q9Z2U0	Psma7	NYTDDAIETDDLTIK	Liver (both lobes)|Red Blood Cells|Skin|Lung|White Adipose|Brown Adipose
Q9Z2U1	Psma5	EELEEVIK	Plasma|Liver (both lobes)|Brain|Red Blood Cells|Kidney|Testes|Skin|Lung
Q9Z2W0	Dnpep	IPHLAIHLQR	Red Blood Cells
Q9Z2Y8	Plpbp	IGSTIFGER	Brain
Q9Z2Z6	Slc25a20	EGITGLYR	Brain|Kidney|Heart
Q9Z315	Sart1	DLQGLTVEHAIDSFR	Skin|Ovary|Spleen|Salivary Gland
